# Supplementary material
Source: PubMed Central journal article supplement (PMC6387626)

# Catalytic One-Step Deoxytrifluoromethylation of Alcohols

Francisco de Azambuja, Sydney M. Lovrien, Patrick Ross, Brett R. Ambler, Ryan A. Altman\*

Department of Medicinal Chemistry, The University of Kansas

Lawrence, KS 66045, United States

raaltman@ku.edu

## Supporting Information – Experimental Details

### Table of Contents:

|                                                                                     |           |
|-------------------------------------------------------------------------------------|-----------|
| <b>Additive Screening Experiment .....</b>                                          | <b>S2</b> |
| <b>Stability of the Phenyl Bromodifluoroacetate (1d).....</b>                       | <b>S3</b> |
| <b>Mechanistic Experiments (Scheme 2).....</b>                                      | <b>S5</b> |
| Study of the Formation of Putative “Active Ester Intermediate” <i>In Situ</i> ..... | S5        |
| Time-Course Analysis of the Reaction.....                                           | S7        |
| <b>NMR Spectra .....</b>                                                            | <b>S8</b> |
| Bromodifluoroacetate Reagents.....                                                  | S8        |
| Reaction Scope .....                                                                | S19       |
| Synthetic Applications (Scheme 1).....                                              | S30       |



## Stability of the Phenyl Bromodifluoroacetate (**1d**)

The stability of phenyl bromodifluoroacetate (**1d**) was tested by storing it in 1-dram vials sealed with a PTFE-lined screw cap under three distinct conditions, namely 1) on the bench, 2) in a desiccator, and 3) in the freezer. The stability of the compound was evaluated by <sup>1</sup>H- and <sup>19</sup>F-NMR analysis (Figure S1 and S2), as well as the deoxytrifluoromethylation reaction of cinnamyl alcohol (**2a**) (Scheme S1). The compound was stable in all situations and showed no signs of decomposition by NMR. The reaction yields decreased as the reagent aged. However, the reaction yields were still satisfactory even after 6–8 months. During this work, the only decomposition pathway observed was the hydrolysis of the compound not properly protected against residual moisture. No light sensitivity was observed.

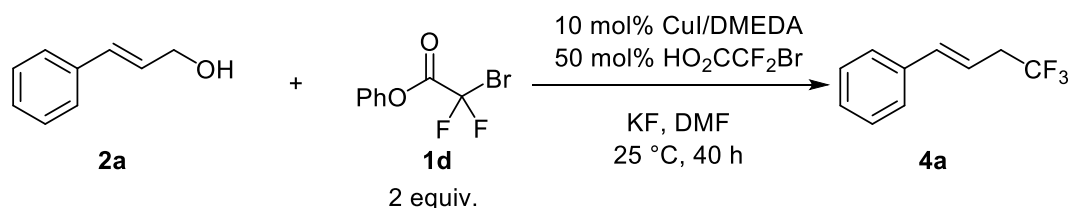

| Period               | Storage Condition |            |         |
|----------------------|-------------------|------------|---------|
|                      | Bench             | Desiccator | Freezer |
| <i>Fresh reagent</i> |                   |            | 86      |
| 37 days              | 86                | 82         |         |
| 97 days              | 75                | 70         |         |
| 183 days             |                   |            | 73      |
| 242 days             |                   |            | 67      |

<sup>a</sup> <sup>19</sup>F-NMR Yields.

**Scheme S1:** Phenyl bromodifluoroacetate (**1d**) provided satisfactory yields of trifluoromethyl compound **4a** after extended storage on the bench, in the desiccator, or in the freezer.

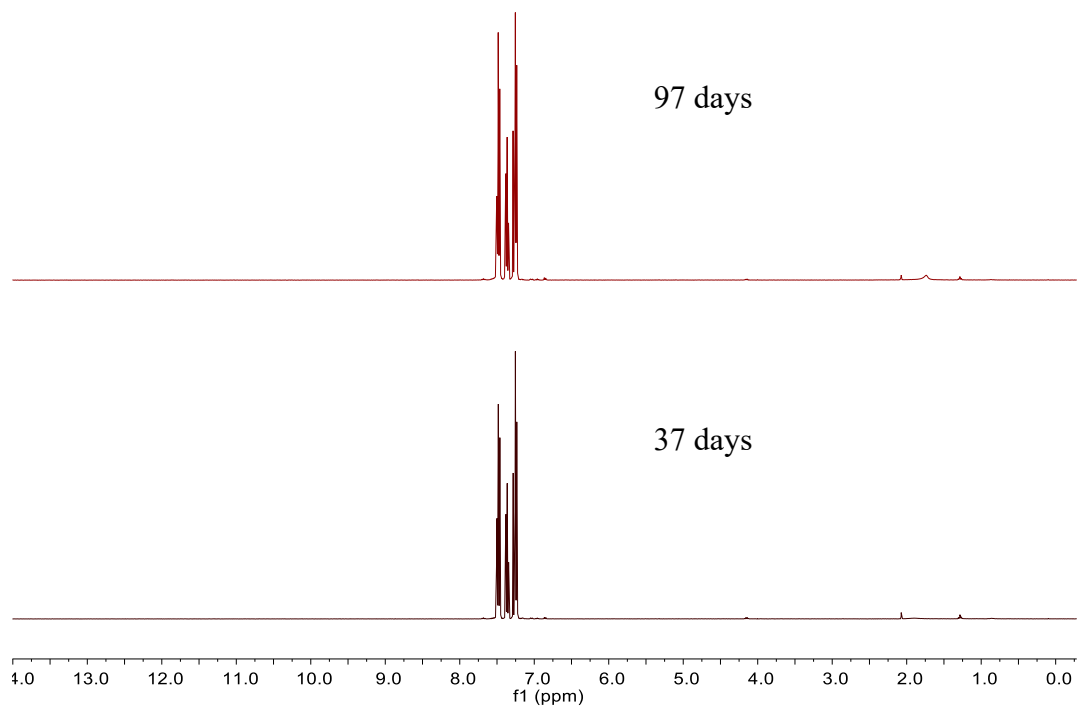

**Figure S1:** Representative  $^1\text{H}$ -NMR spectra of phenyl bromodifluoroacetate (**1d**) obtained during the study of its stability. The spectra showed are from the sample stored on the bench.

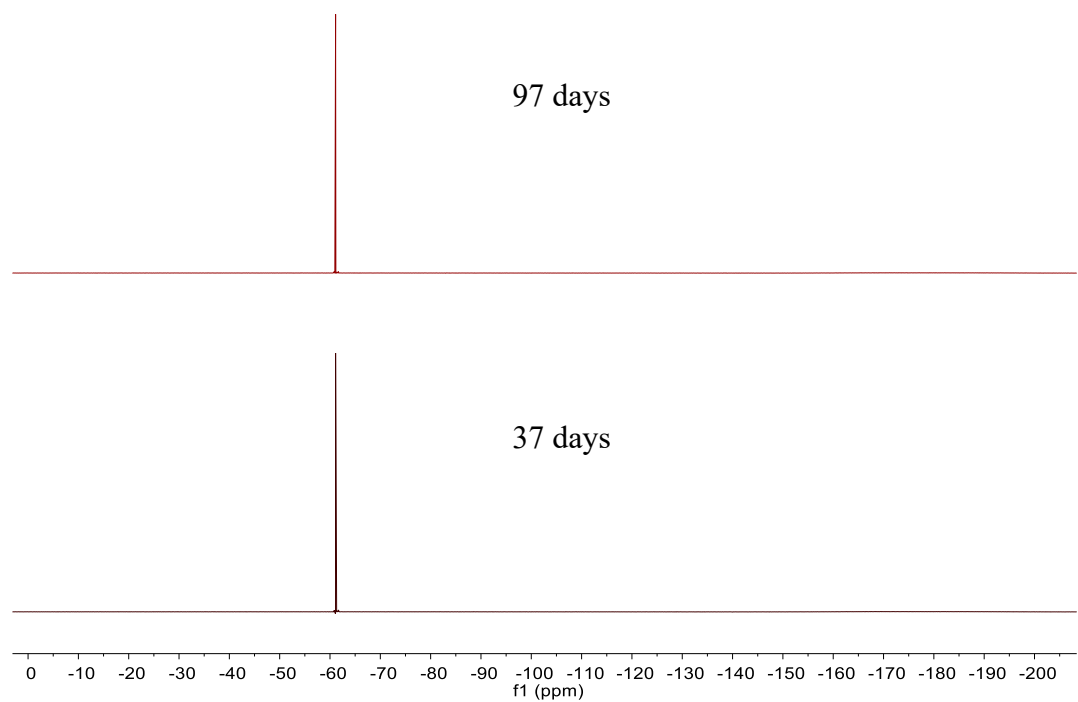

**Figure S2:** Representative  $^{19}\text{F}$ -NMR spectra of phenyl bromodifluoroacetate (**1d**) obtained during the study of its stability. The spectra showed are from the sample stored on the bench.

## Mechanistic Experiments (Scheme 2)

To better understand the reaction pathway, some experiments were done to probe the mechanism of the reaction. Specifically, the stability of phenyl bromodifluoroacetate (**1d**) under reaction conditions, the kinetic profile of the first hours of reaction, and a stepwise addition to study the formation of the intermediate ester.

### Study of the Formation of Putative “Active Ester Intermediate” *In Situ*

KF facilitated the fast formation of the putative bromodifluoroacetate ester intermediate, as shown by stepwise addition of KF and bromodifluoroacetic acid to a DMF solution of cinnamyl alcohol **2a** and phenyl bromodifluoroacetate (**1d**). The key role of KF was both in the presence and absence of bromodifluoroacetic acid.

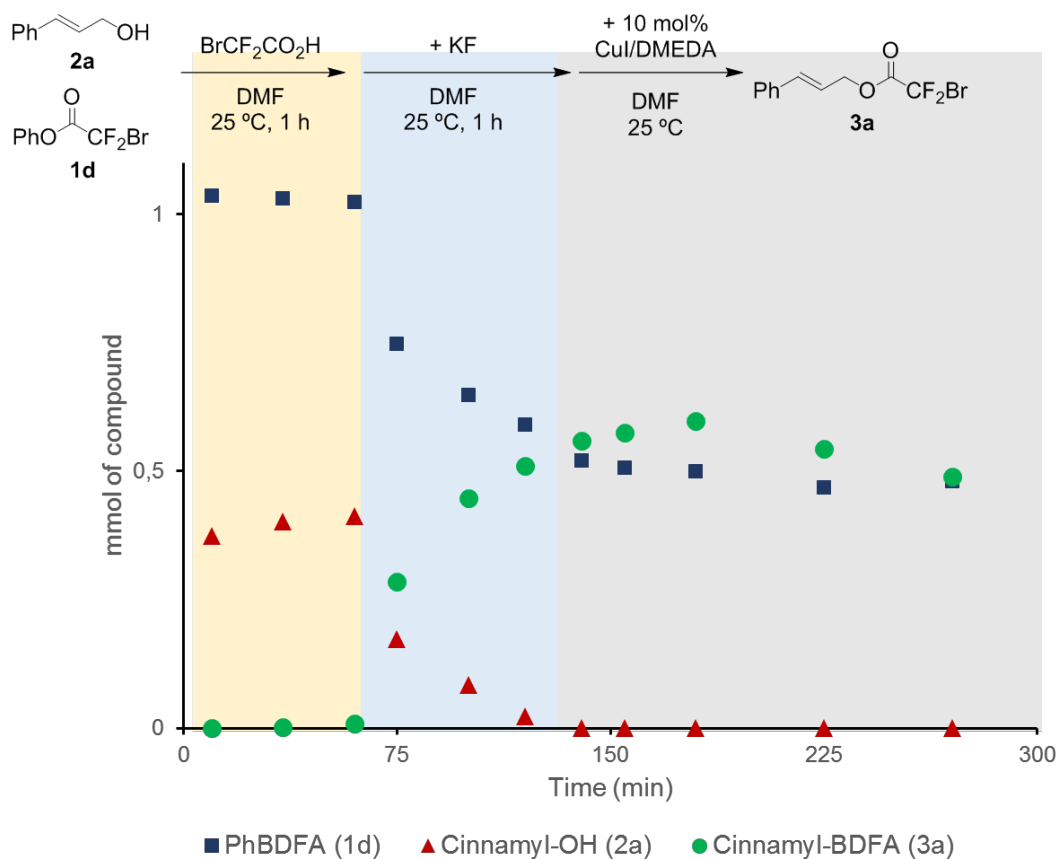

**Figure S3:** Cinnamyl Bromodifluoroacetate (**3a**) Formation Upon Stepwise Addition of KF and Bromodifluoroacetic Acid.

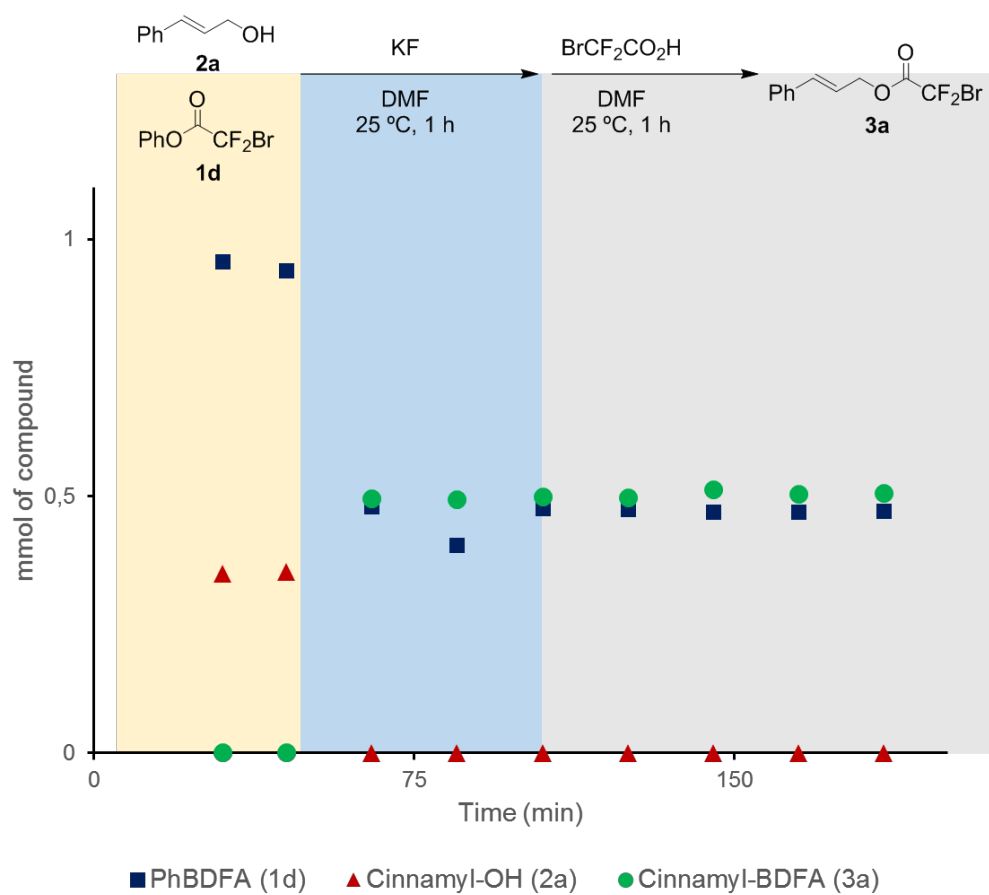

**Figure S4:** Cinnamyl Bromodifluoroacetate (**3a**) Formation Upon Stepwise Addition of KF and Bromodifluoroacetic Acid.

## Time-Course Analysis of the Reaction

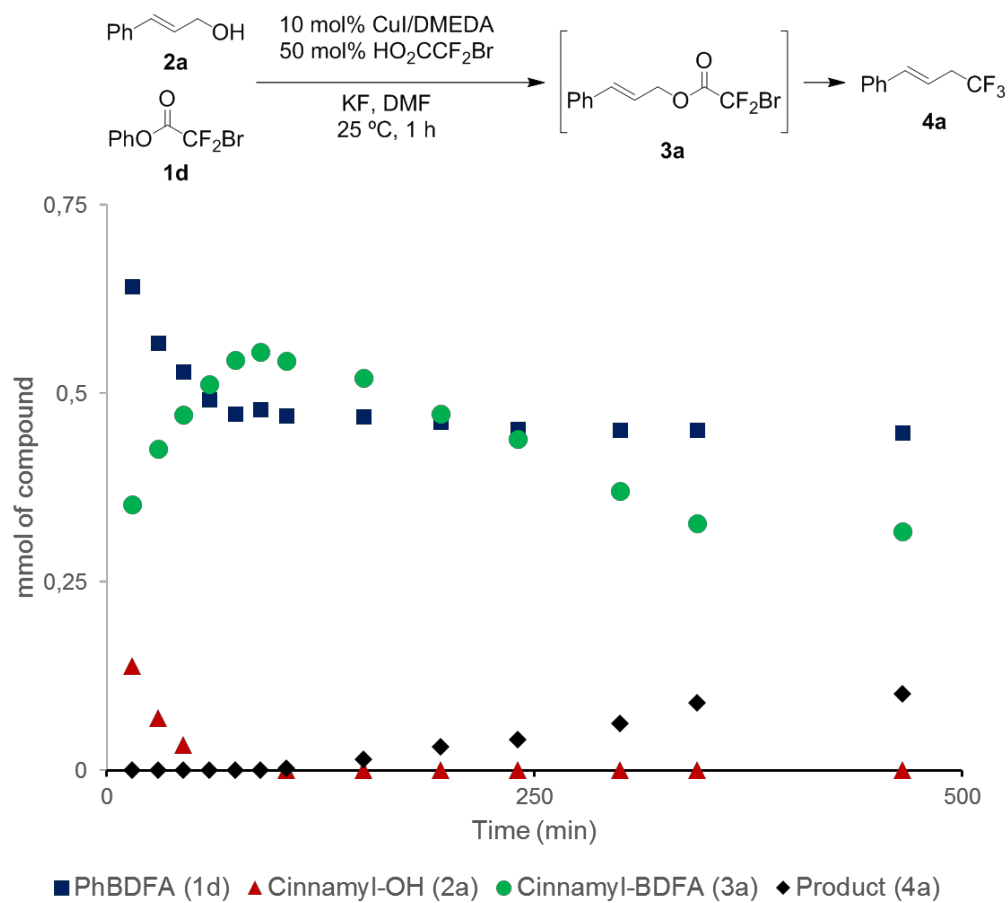

**Figure S5:** Time Course Analysis of the Deoxytrifluorometylation of Alcohol **2a**

# NMR Spectra

## Bromodifluoroacetate Reagents

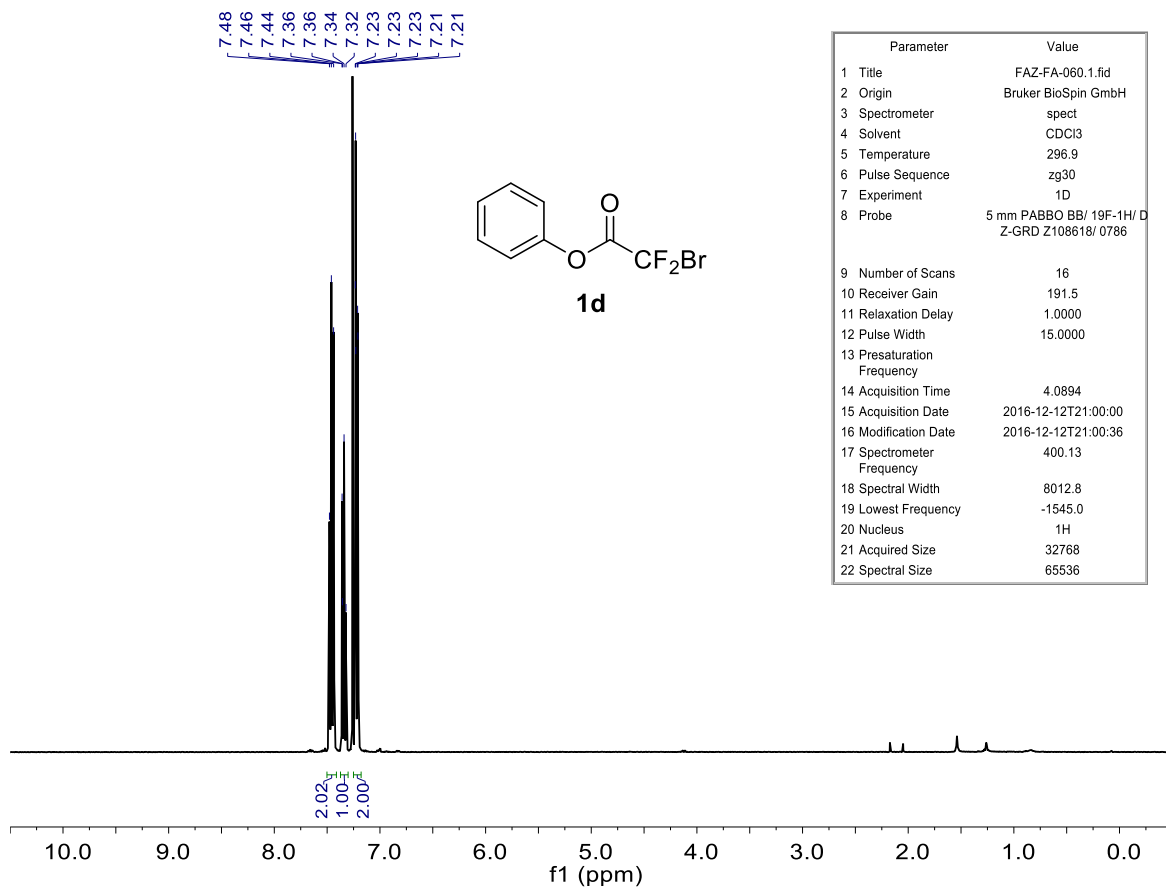



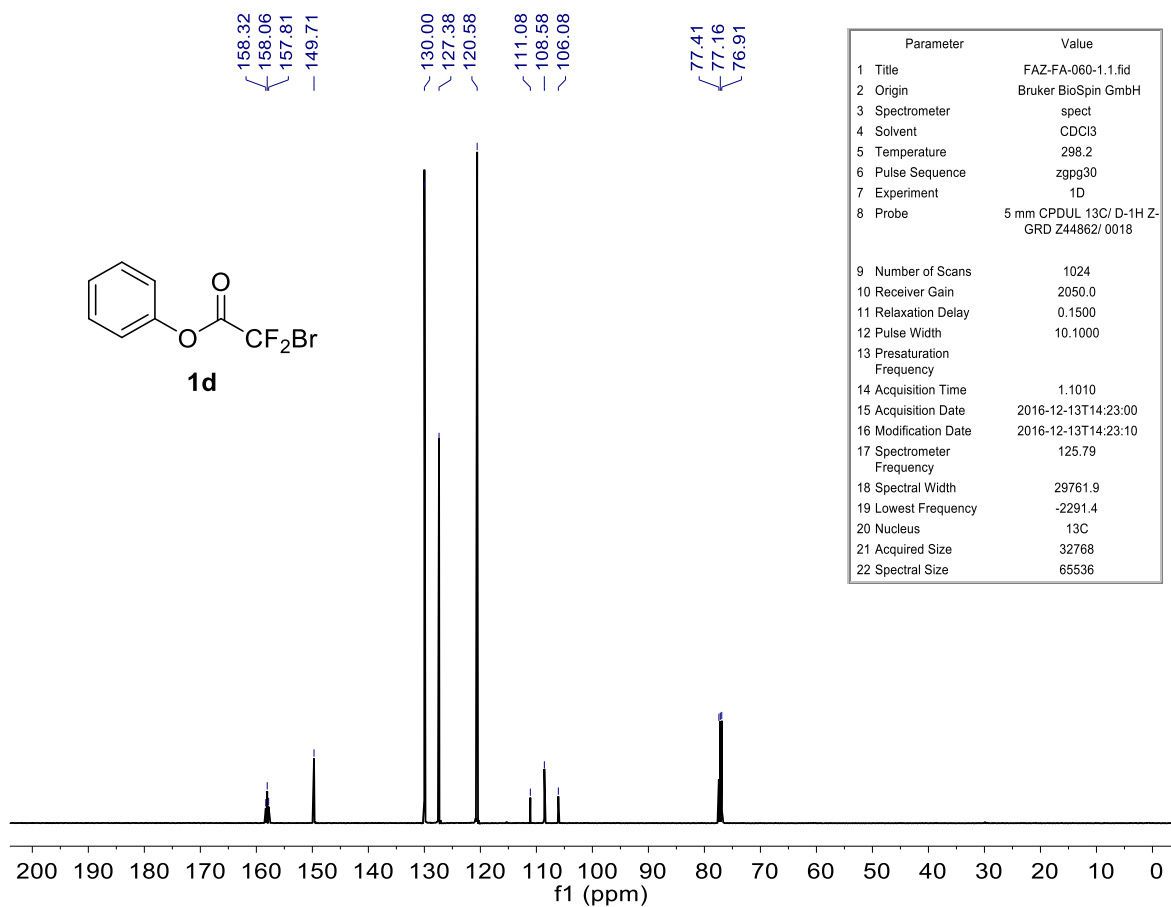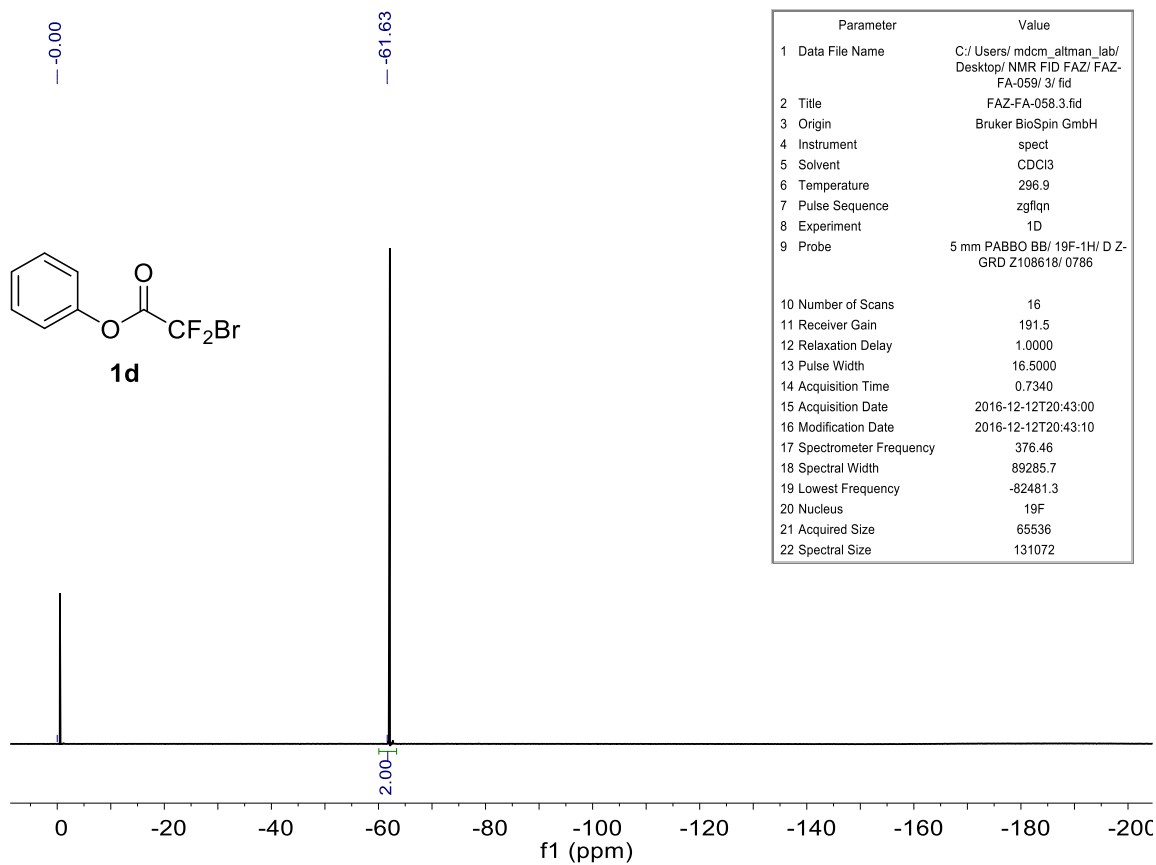

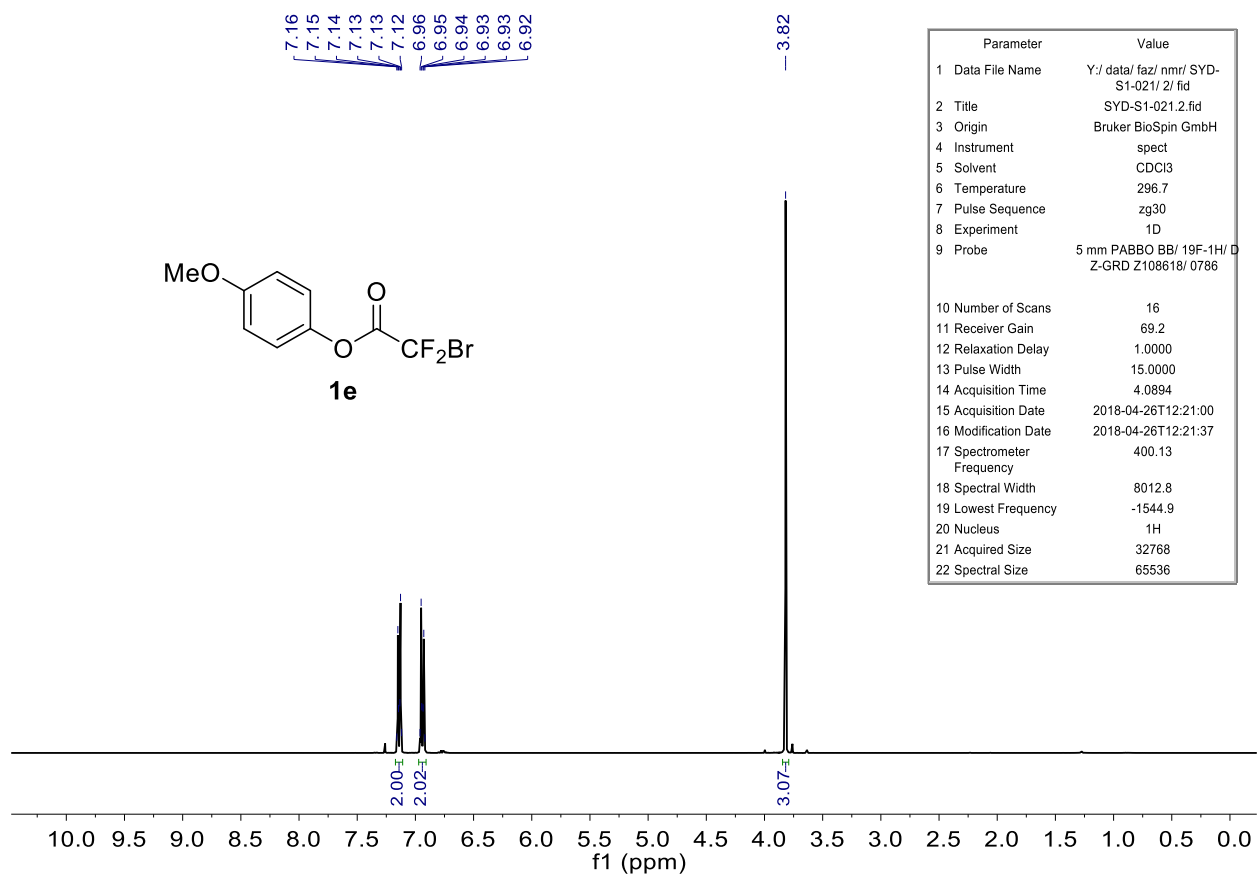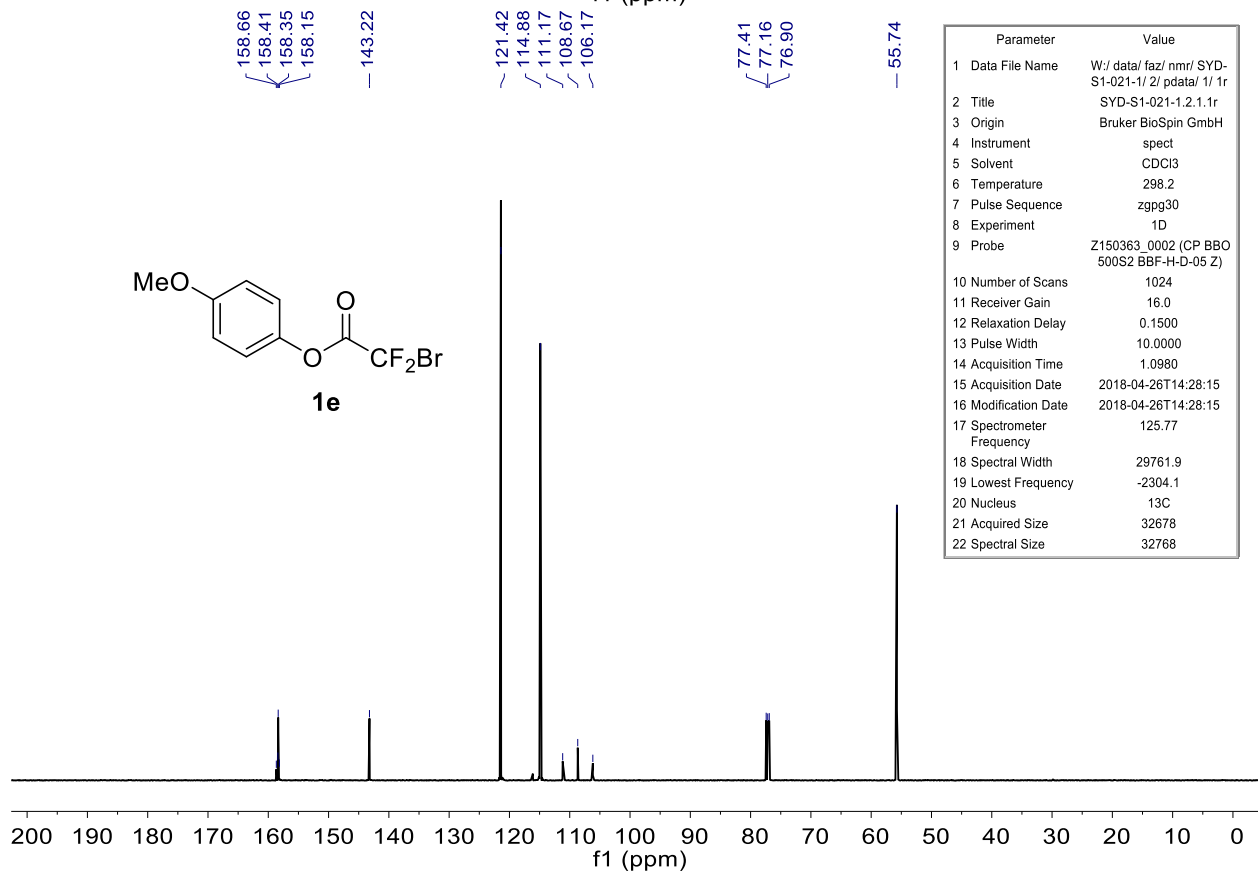

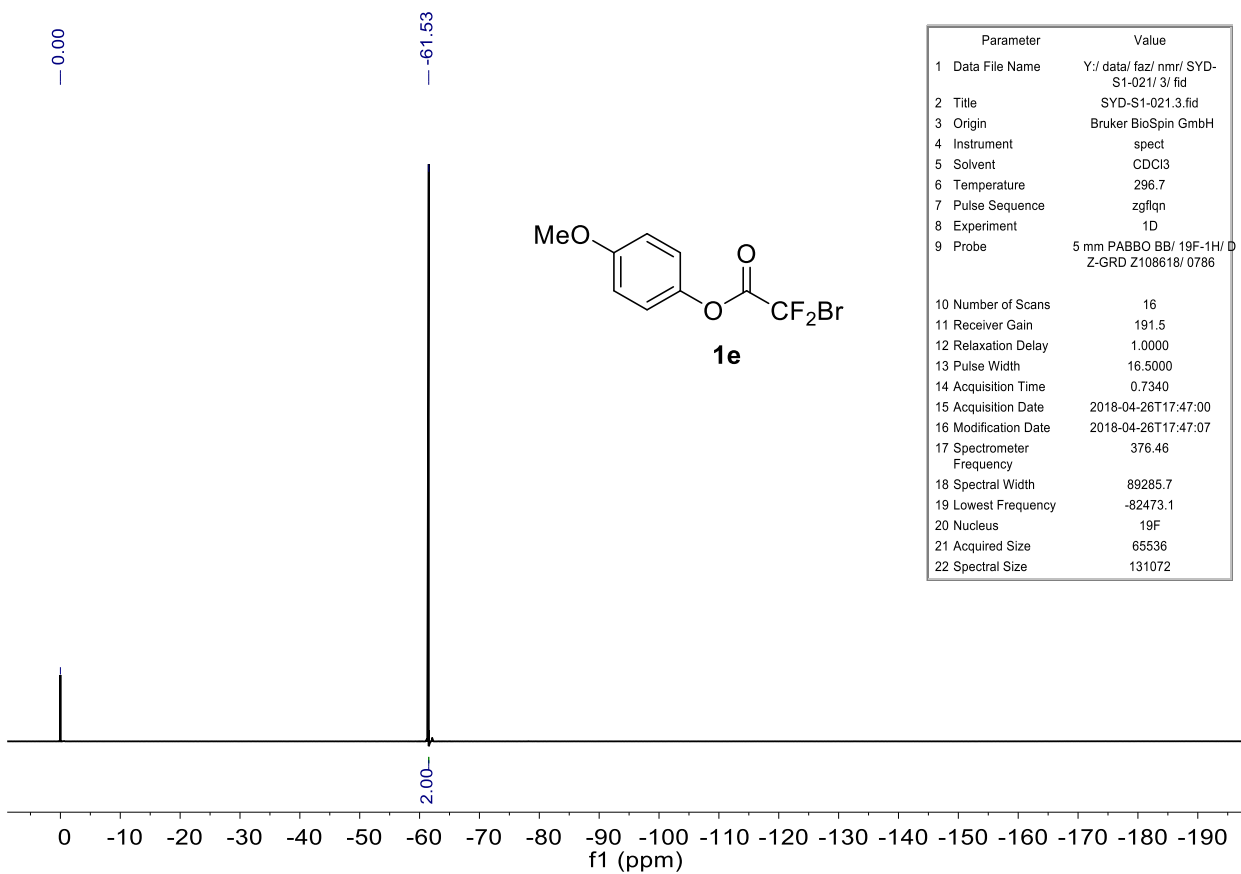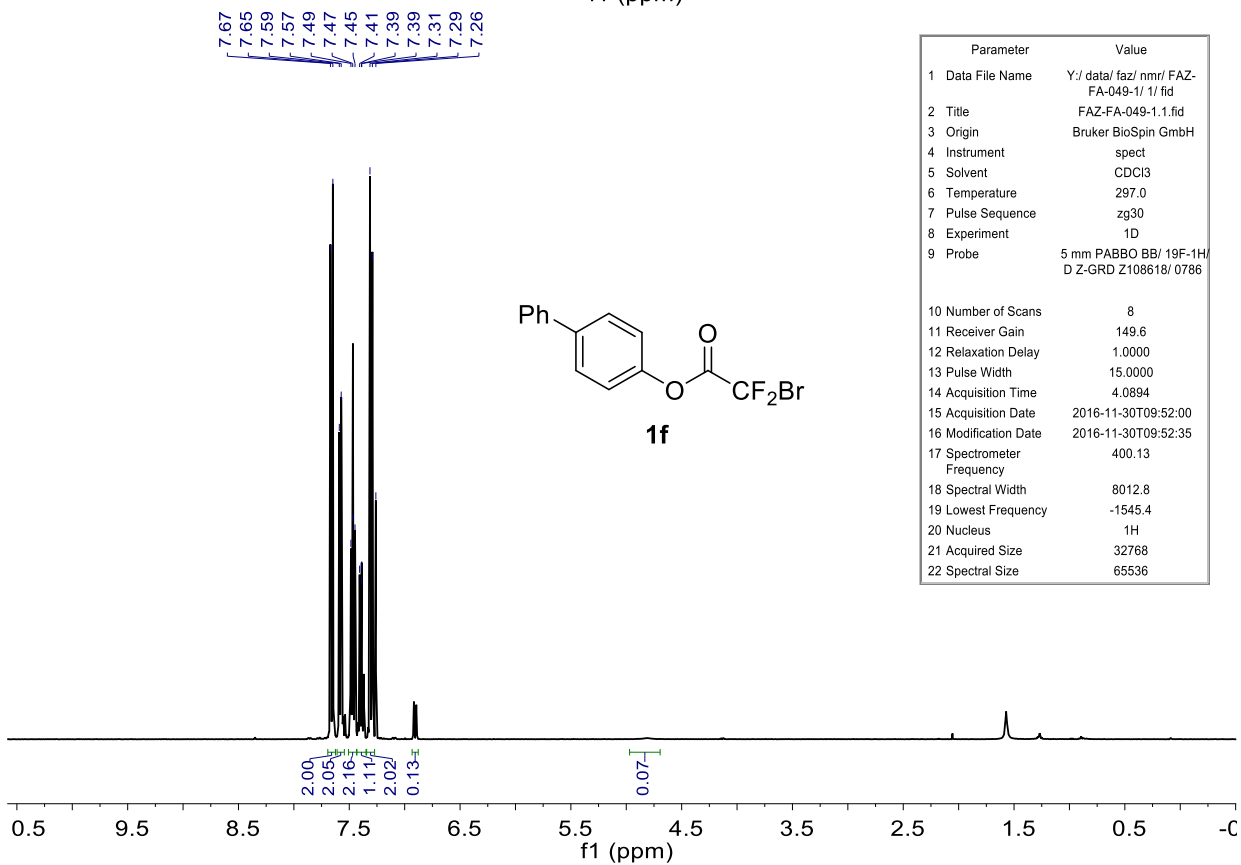

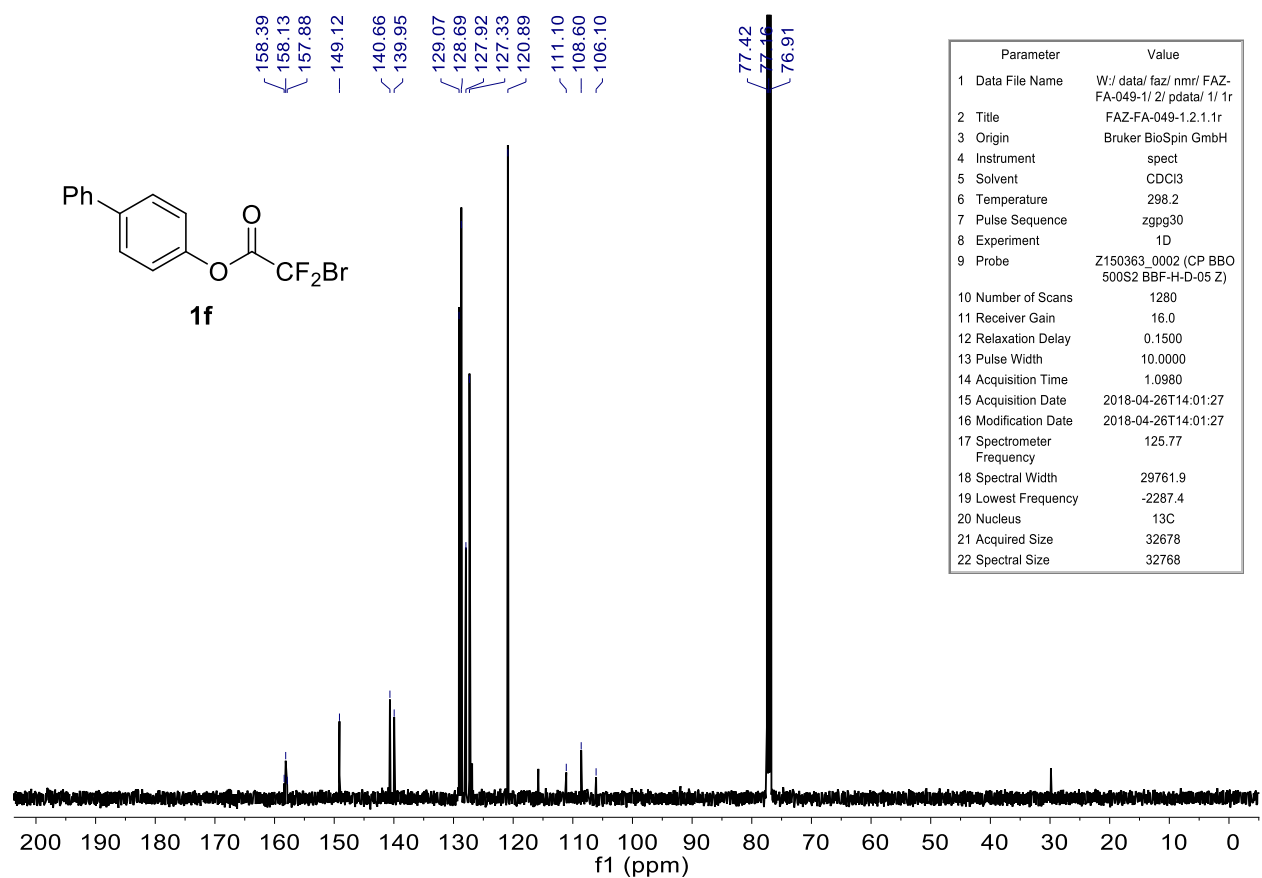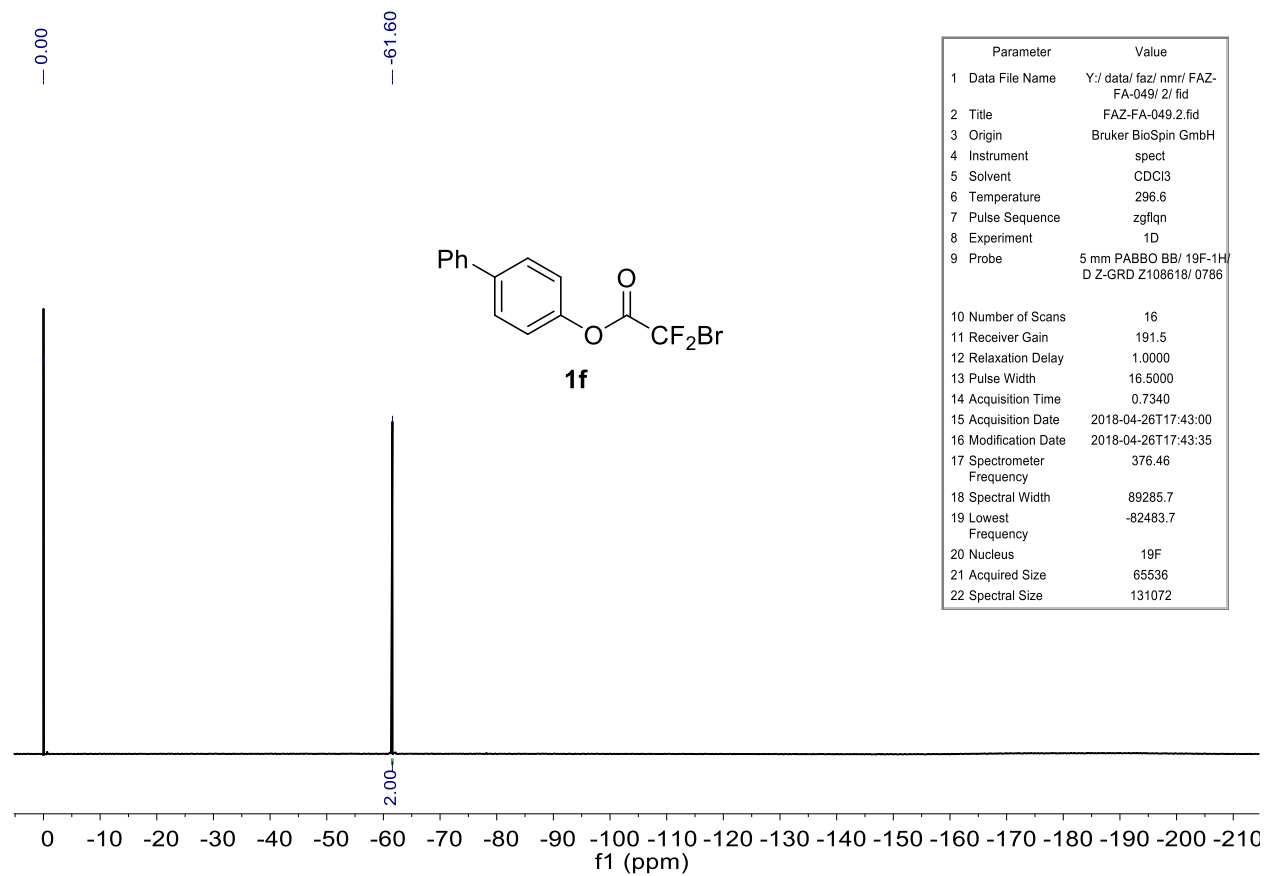

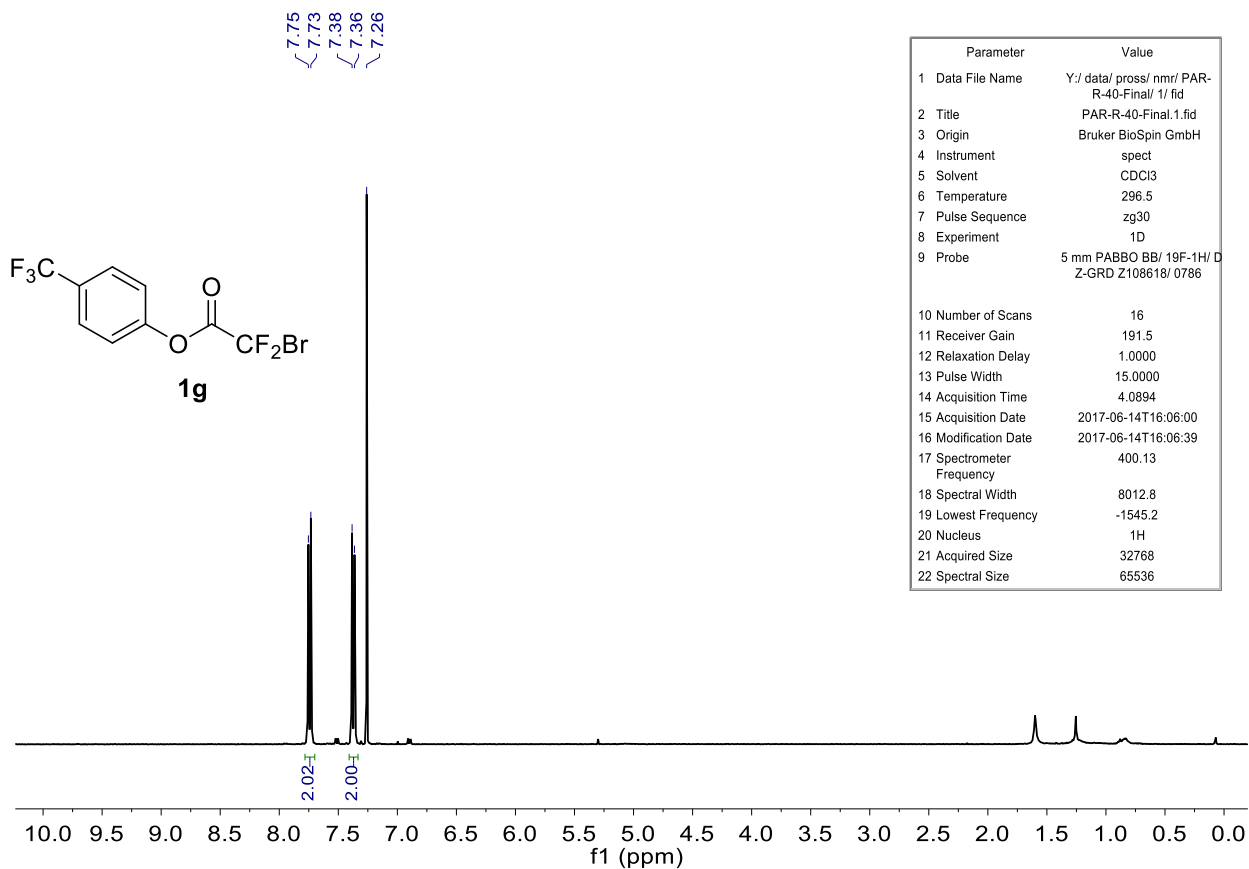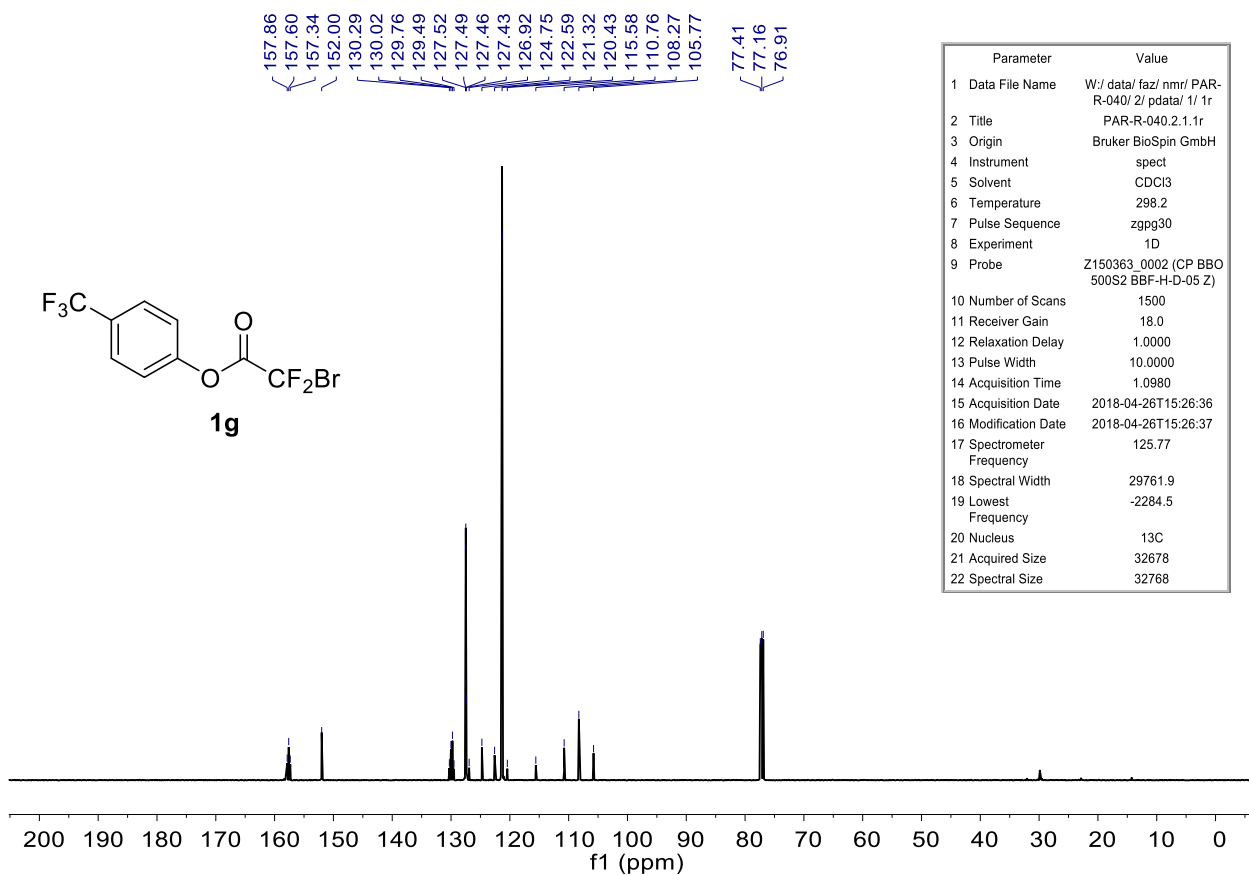

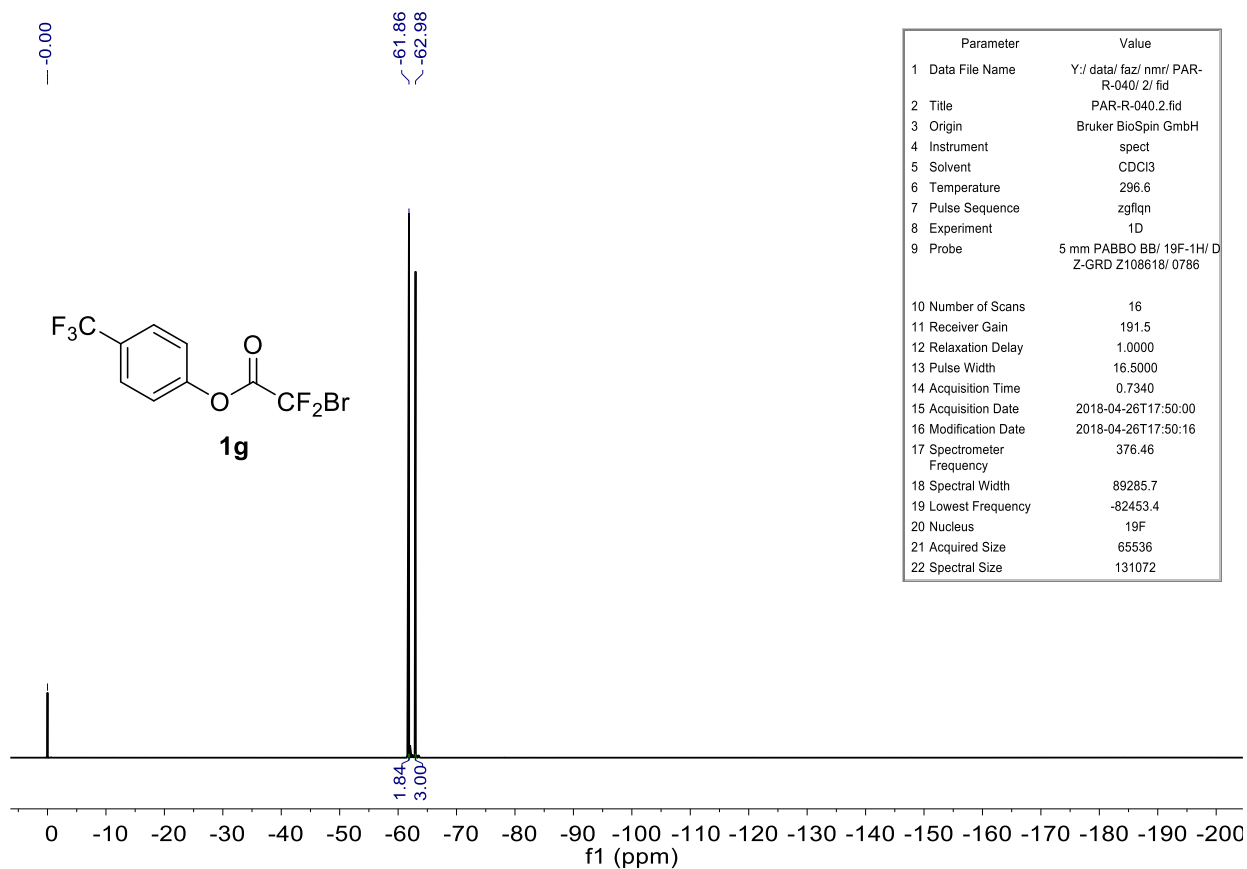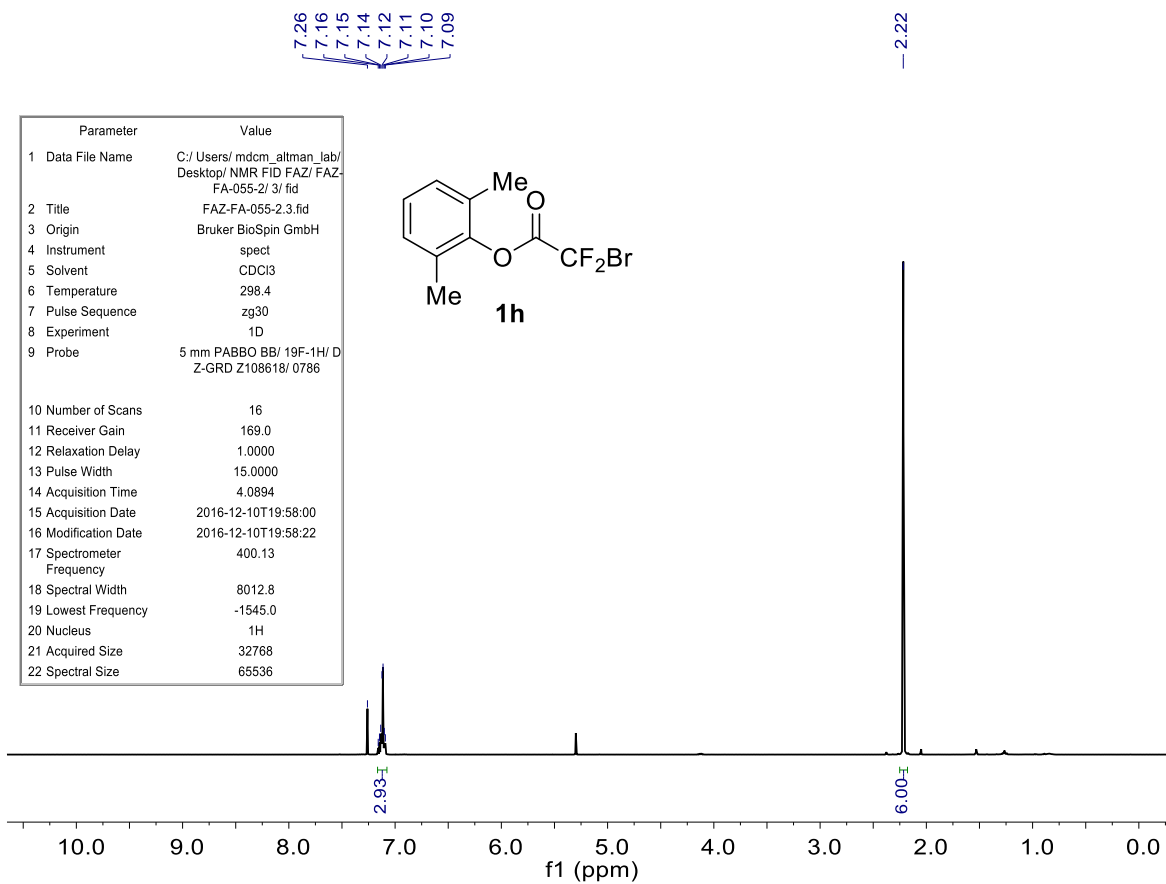

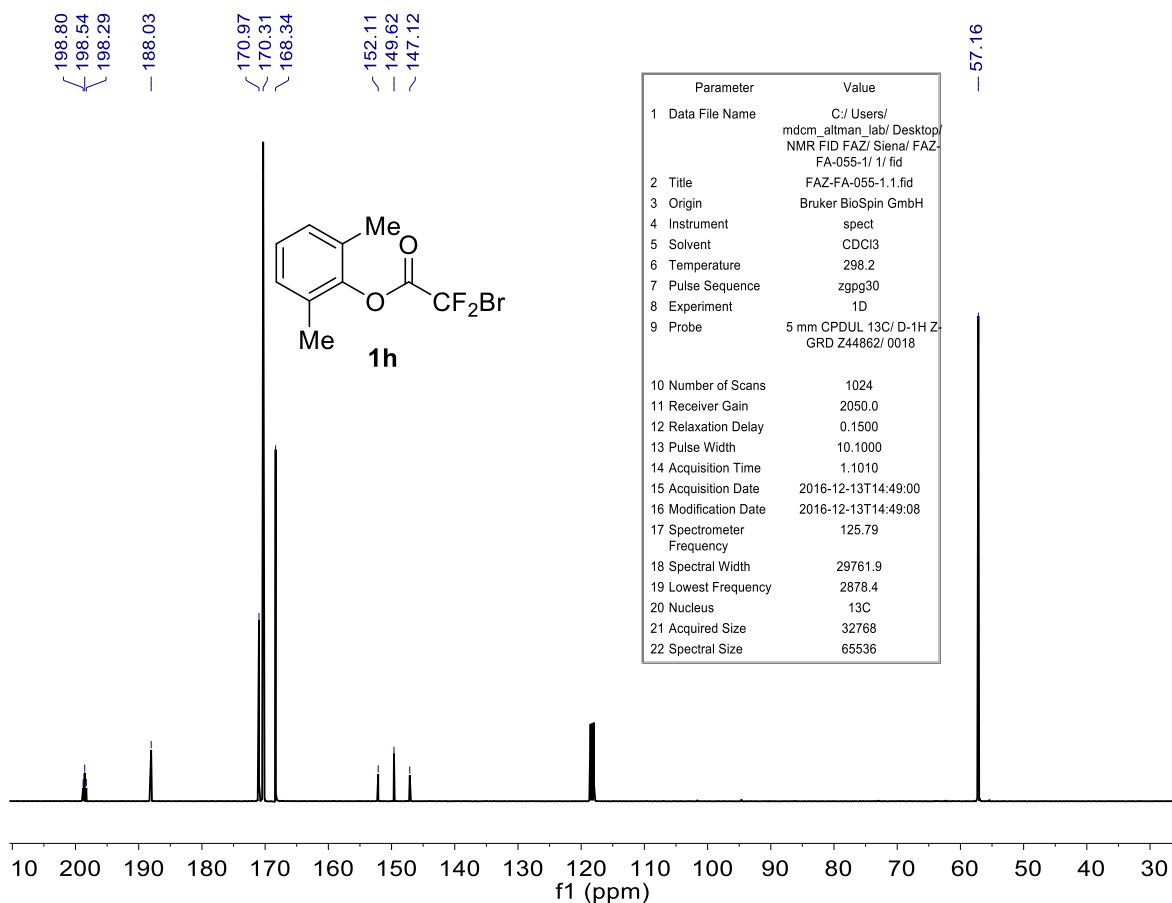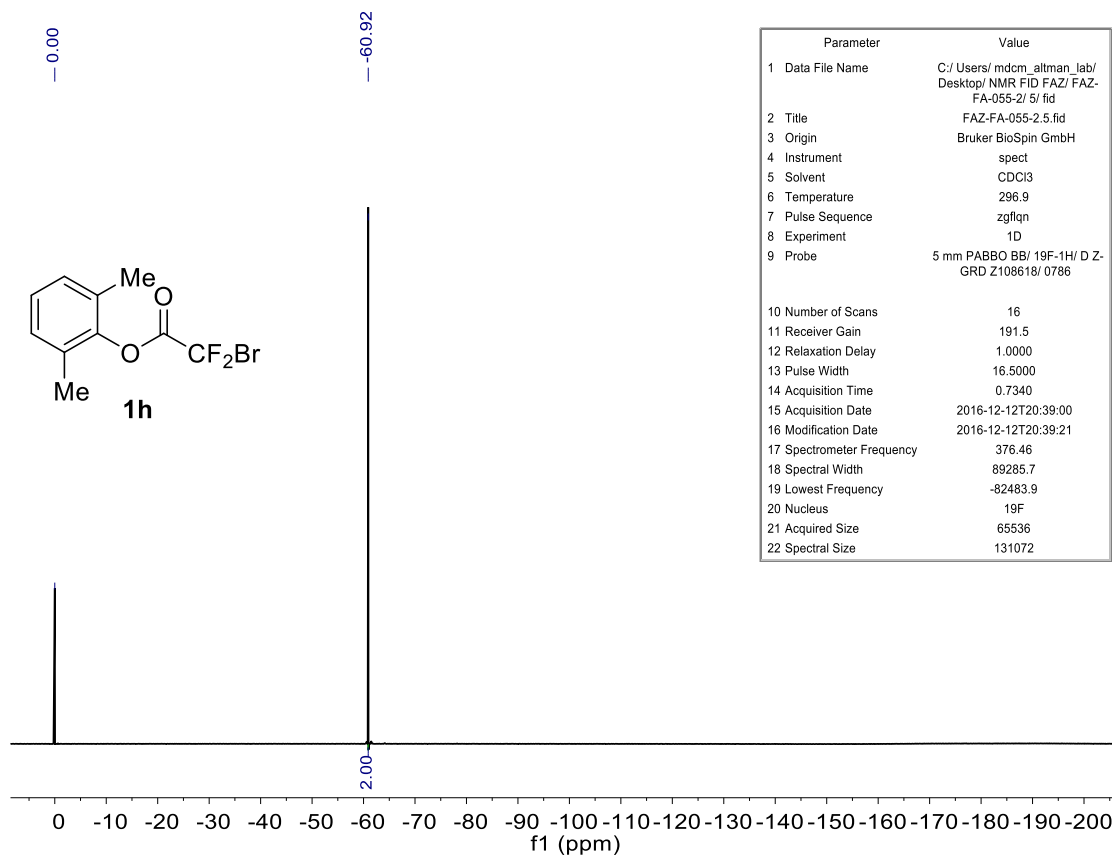

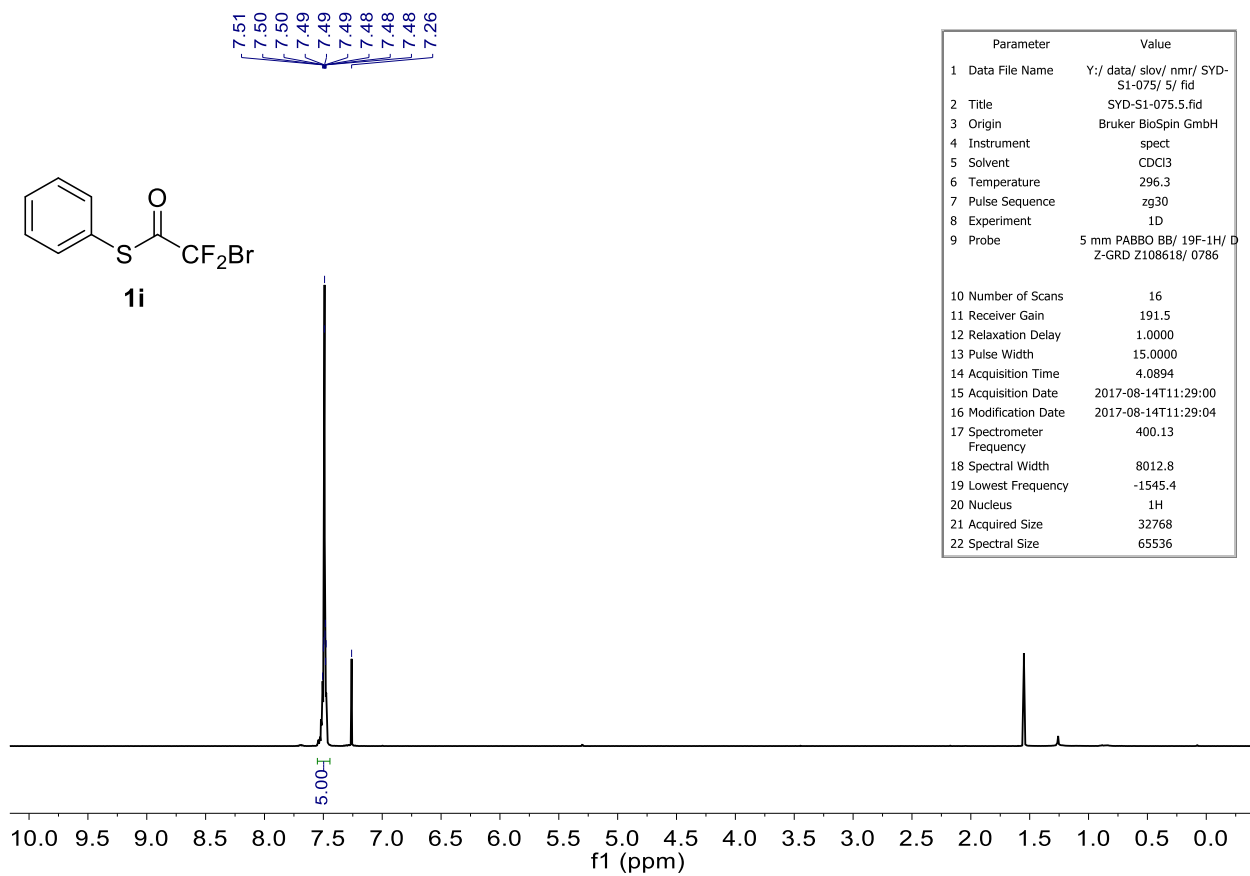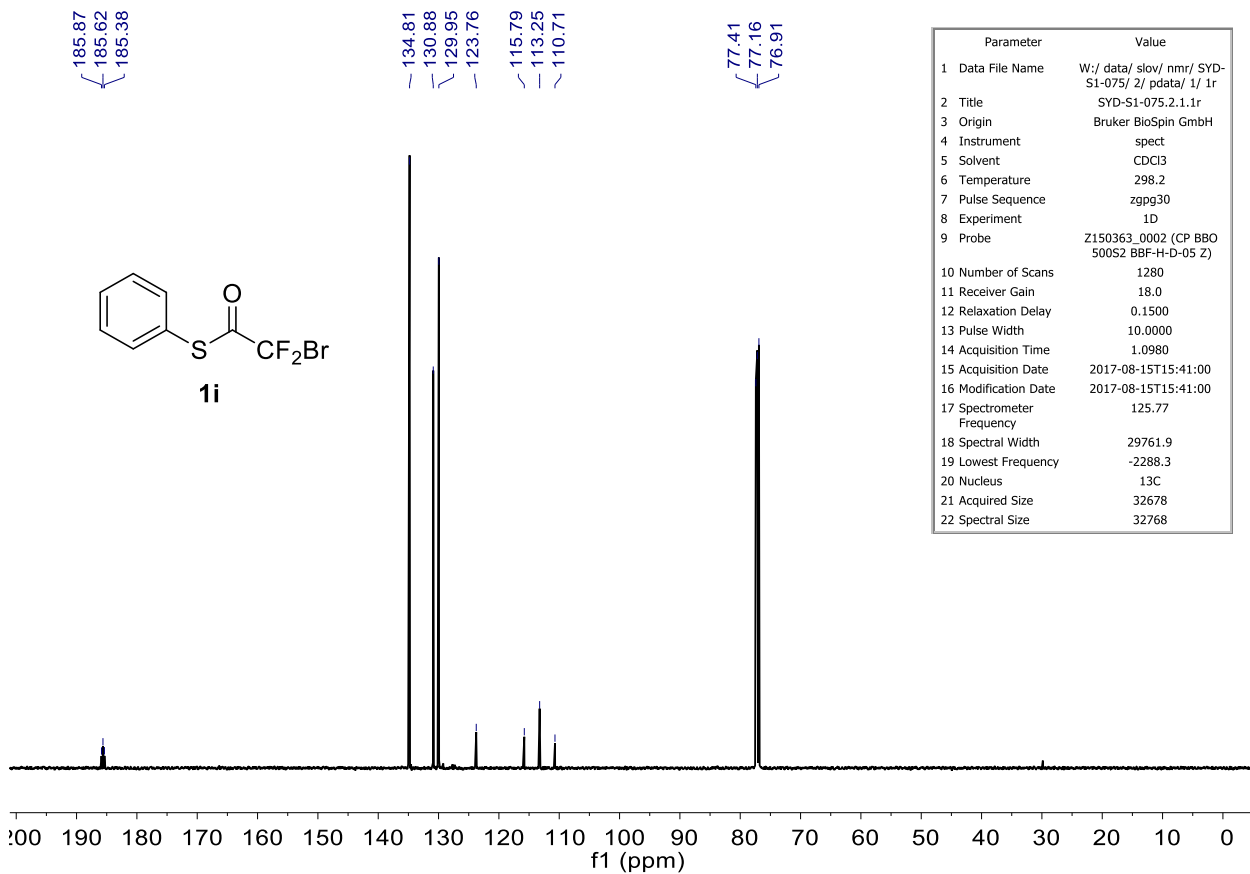



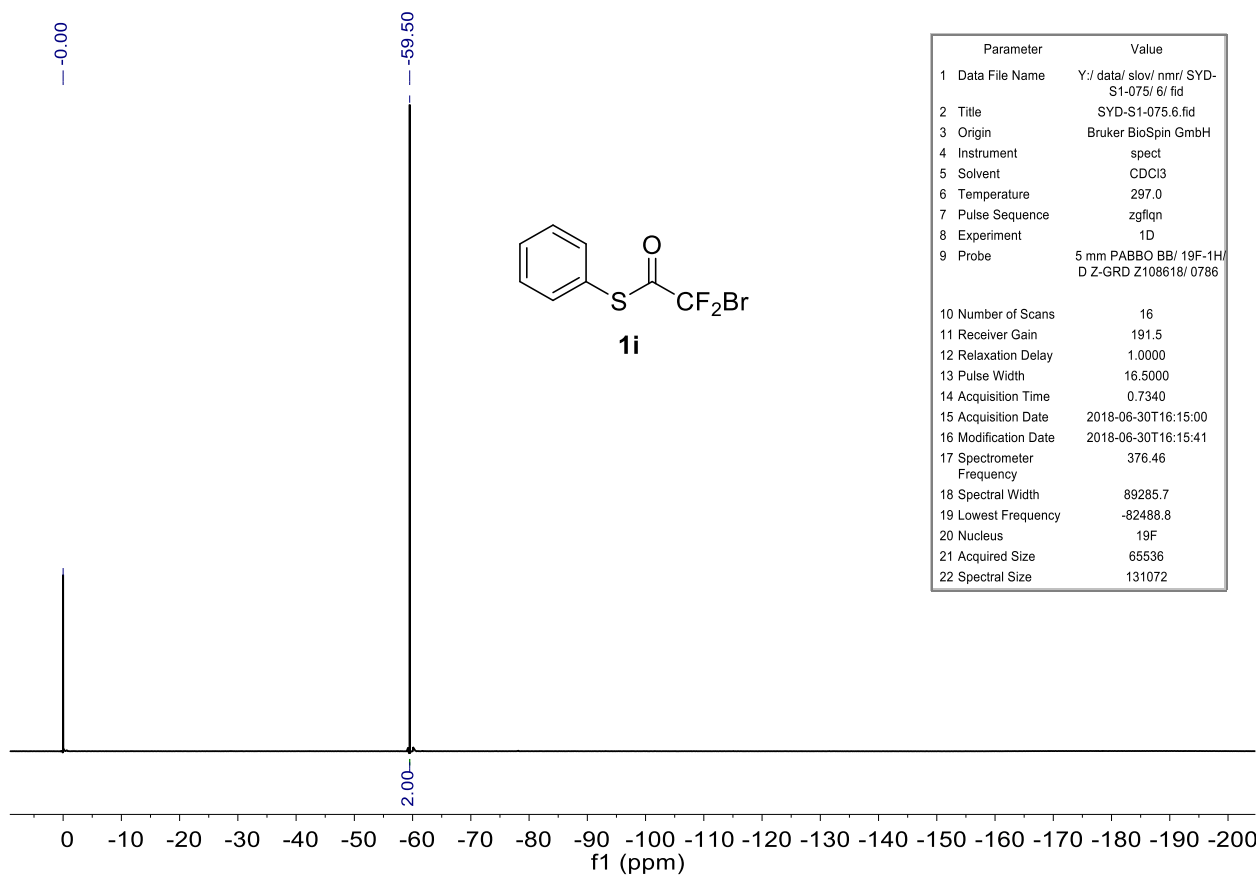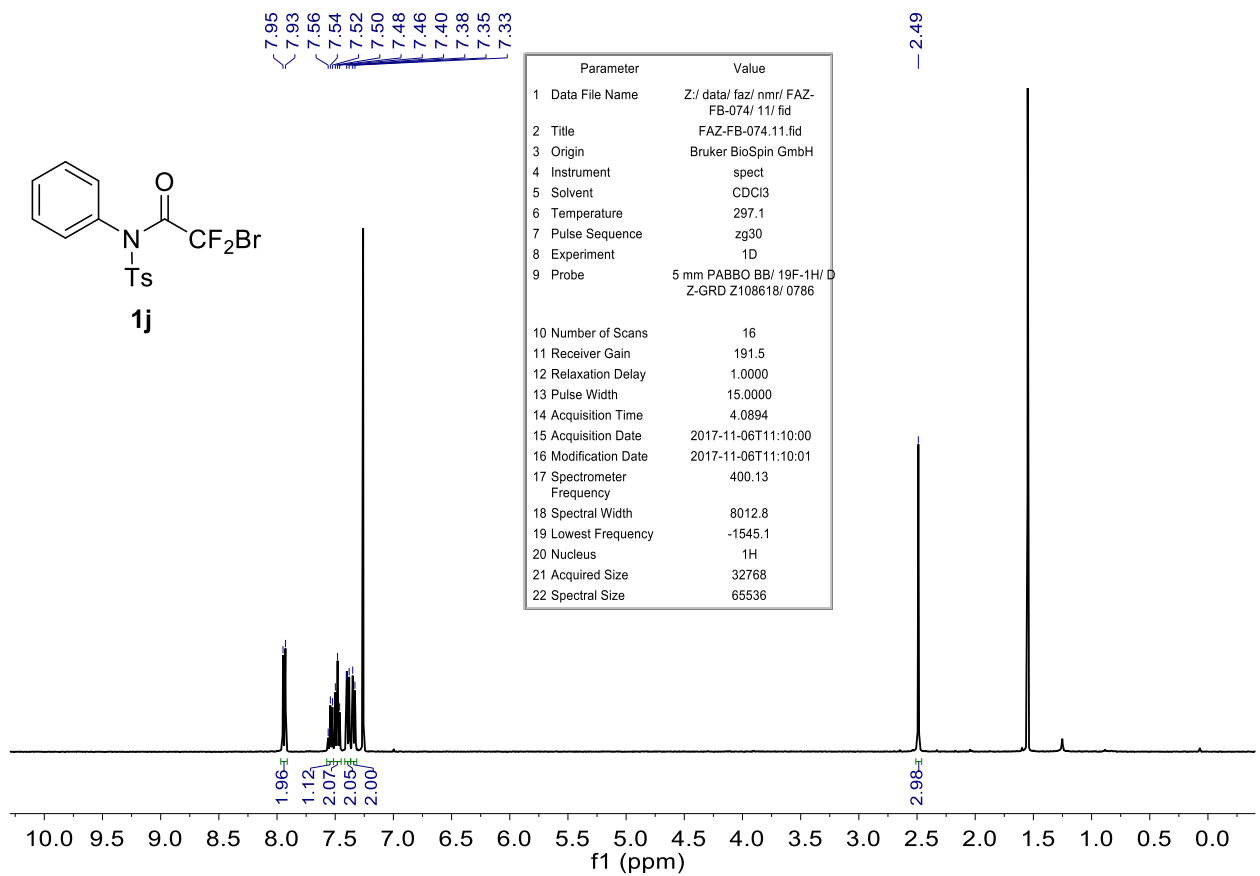

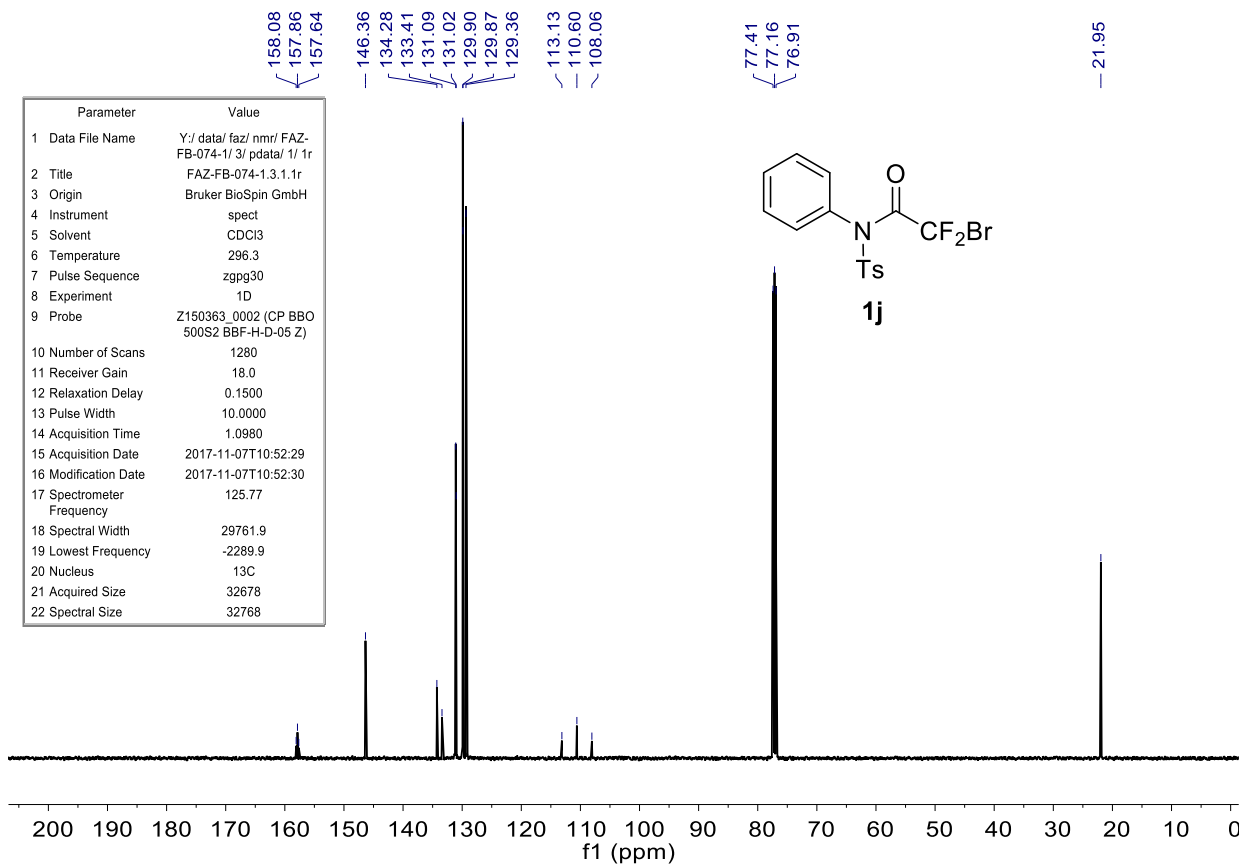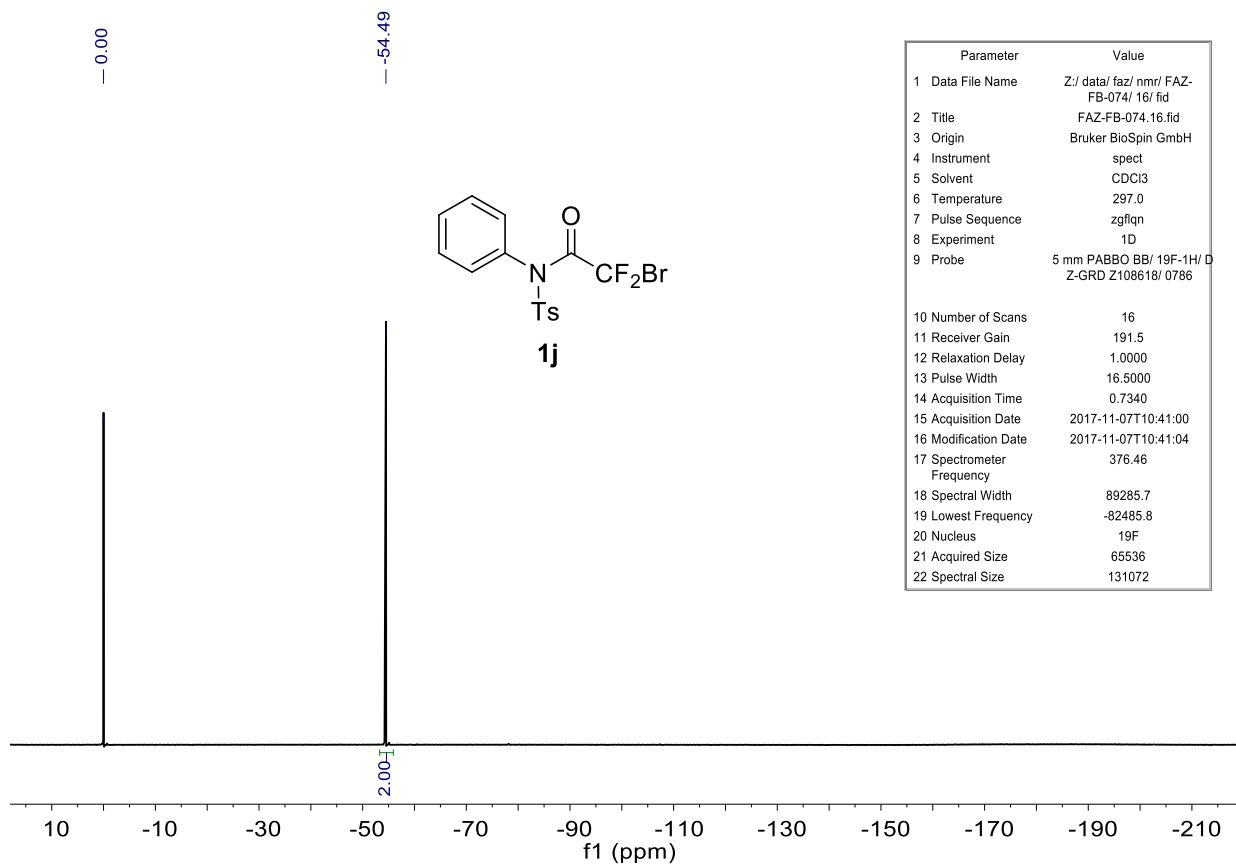

## Reaction Scope

### Allyl Trifluoromethanes (Table 2)

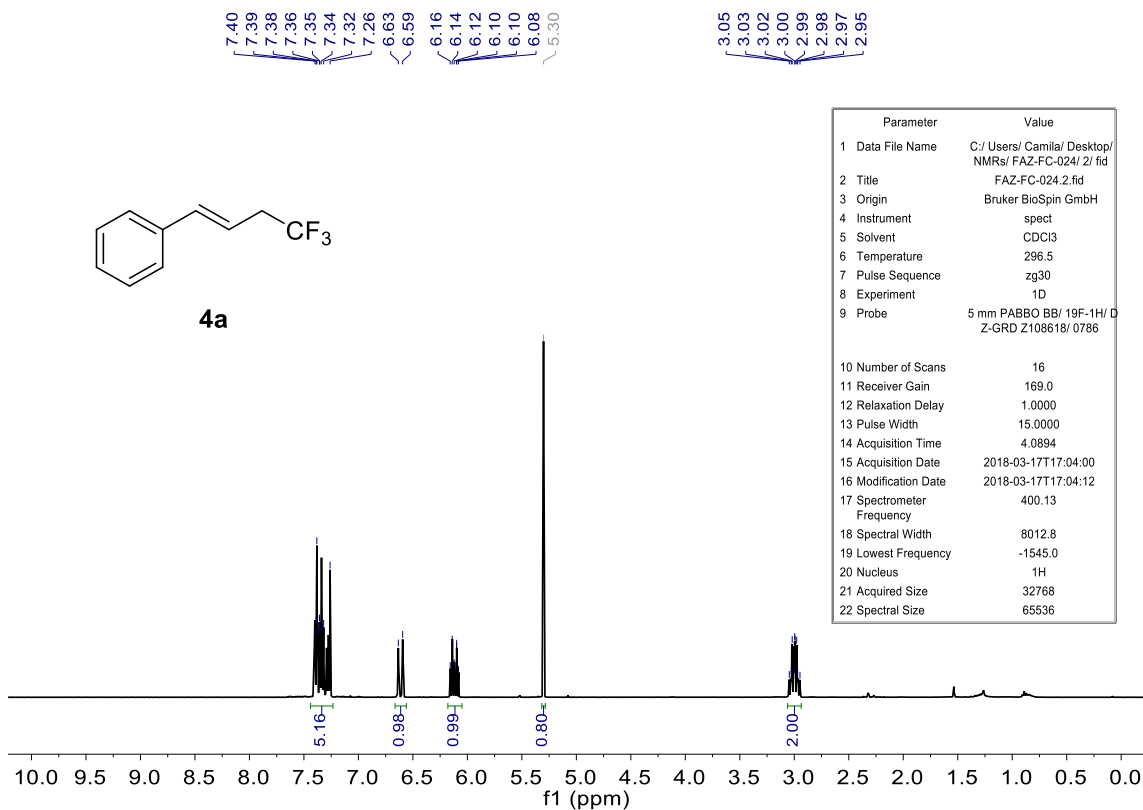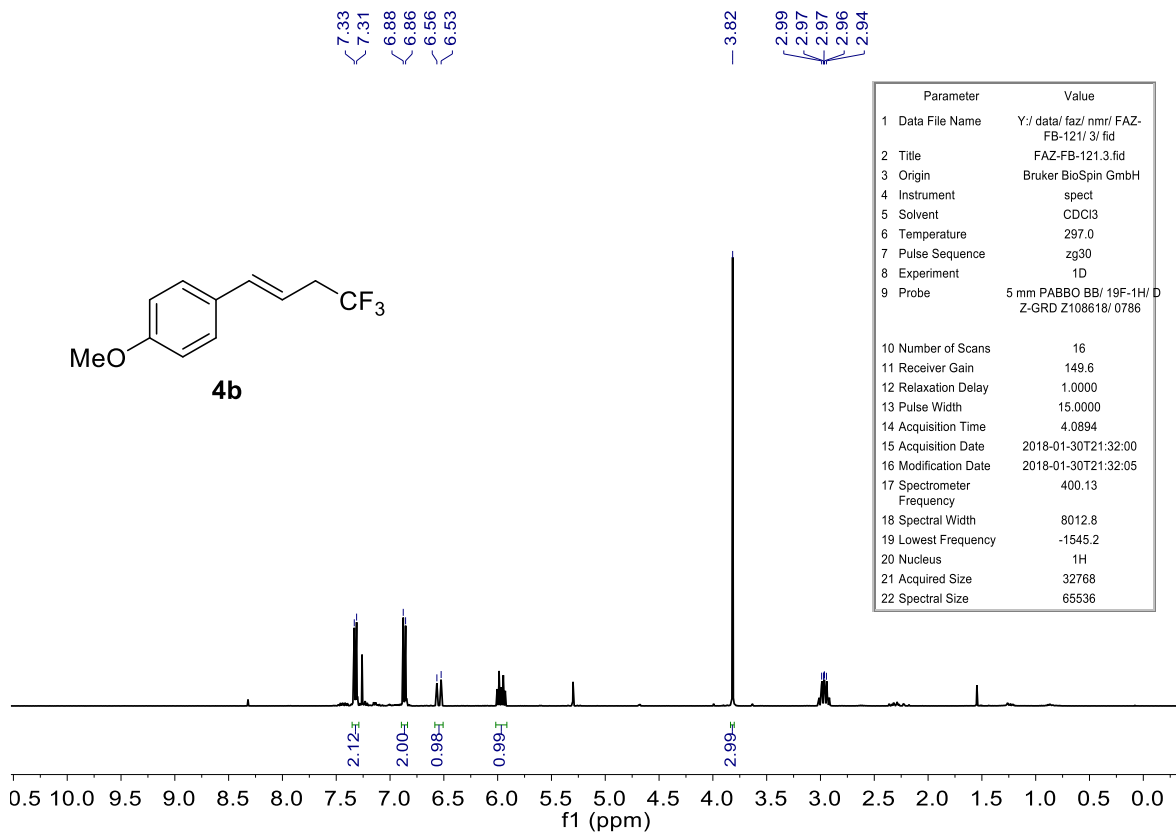

| Parameter                 | Value                                        |
|---------------------------|----------------------------------------------|
| 1 Data File Name          | Y:/ data/ faz/ nmr/ FAZ-FB-122/ 7/ fid       |
| 2 Title                   | FAZ-FB-122.7.fid                             |
| 3 Origin                  | Bruker BioSpin GmbH                          |
| 4 Instrument              | spect                                        |
| 5 Solvent                 | CDCl3                                        |
| 6 Temperature             | 296.9                                        |
| 7 Pulse Sequence          | zg30                                         |
| 8 Experiment              | 1D                                           |
| 9 Probe                   | 5 mm PABBO BB/ 19F-1H/ D Z-GRD Z108618/ 0786 |
| 10 Number of Scans        | 16                                           |
| 11 Receiver Gain          | 191.5                                        |
| 12 Relaxation Delay       | 1.0000                                       |
| 13 Pulse Width            | 15.0000                                      |
| 14 Acquisition Time       | 4.0894                                       |
| 15 Acquisition Date       | 2018-07-17T16:17:00                          |
| 16 Modification Date      | 2018-07-17T16:17:44                          |
| 17 Spectrometer Frequency | 400.13                                       |
| 18 Spectral Width         | 8012.8                                       |
| 19 Lowest Frequency       | -1545.4                                      |
| 20 Nucleus                | 1H                                           |
| 21 Acquired Size          | 32768                                        |
| 22 Spectral Size          | 65536                                        |

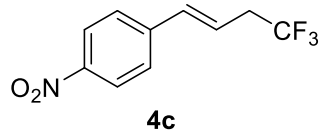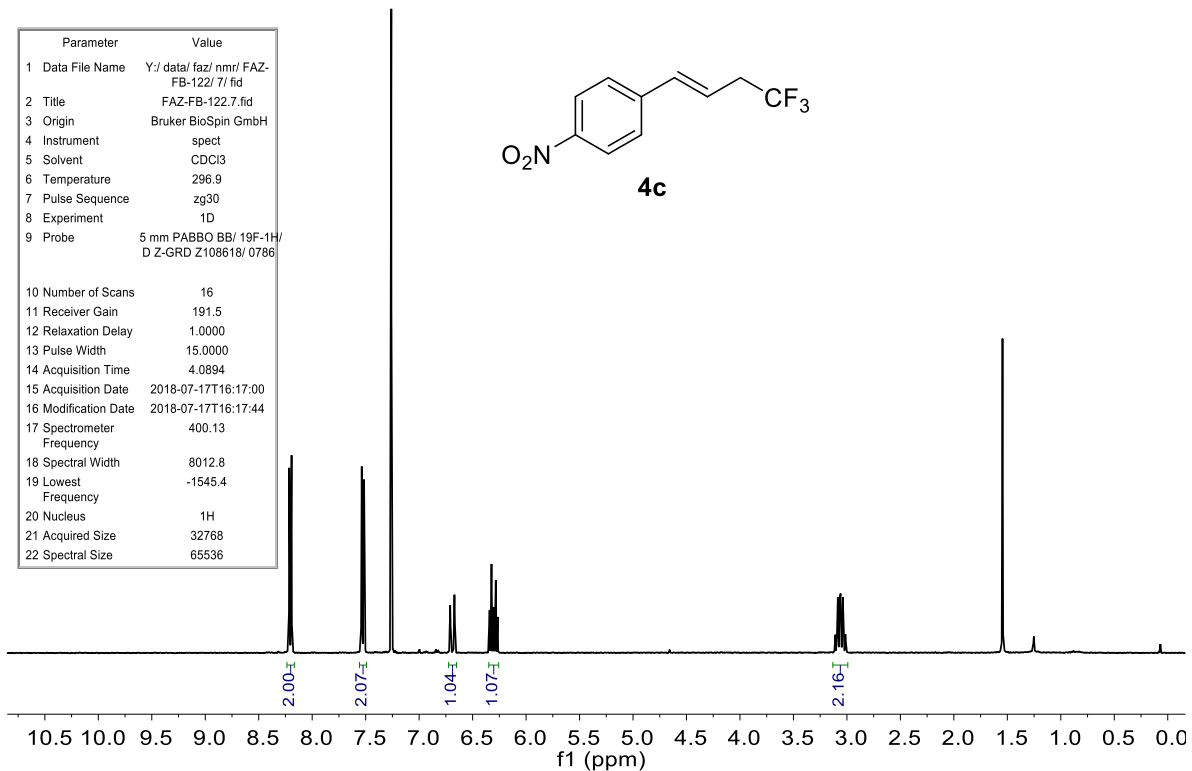

| Parameter                 | Value                                        |
|---------------------------|----------------------------------------------|
| 1 Data File Name          | Z:/ data/ faz/ nmr/ FAZ-FB-118/ 5/ fid       |
| 2 Title                   | FAZ-FB-118.5.fid                             |
| 3 Origin                  | Bruker BioSpin GmbH                          |
| 4 Instrument              | spect                                        |
| 5 Solvent                 | CDCl3                                        |
| 6 Temperature             | 297.0                                        |
| 7 Pulse Sequence          | zg30                                         |
| 8 Experiment              | 1D                                           |
| 9 Probe                   | 5 mm PABBO BB/ 19F-1H/ D Z-GRD Z108618/ 0786 |
| 10 Number of Scans        | 16                                           |
| 11 Receiver Gain          | 169.0                                        |
| 12 Relaxation Delay       | 1.0000                                       |
| 13 Pulse Width            | 15.0000                                      |
| 14 Acquisition Time       | 4.0894                                       |
| 15 Acquisition Date       | 2018-01-30T15:35:00                          |
| 16 Modification Date      | 2018-01-30T15:35:17                          |
| 17 Spectrometer Frequency | 400.13                                       |
| 18 Spectral Width         | 8012.8                                       |
| 19 Lowest Frequency       | -1545.3                                      |
| 20 Nucleus                | 1H                                           |
| 21 Acquired Size          | 32768                                        |
| 22 Spectral Size          | 65536                                        |

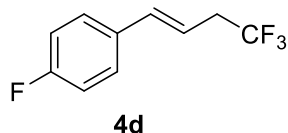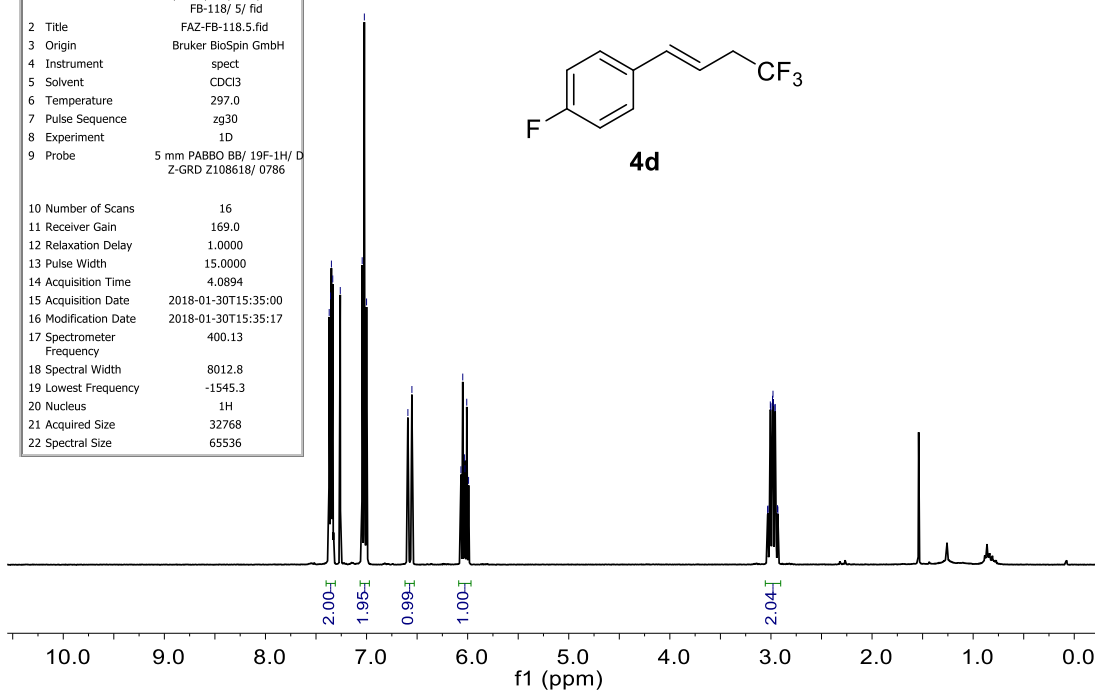

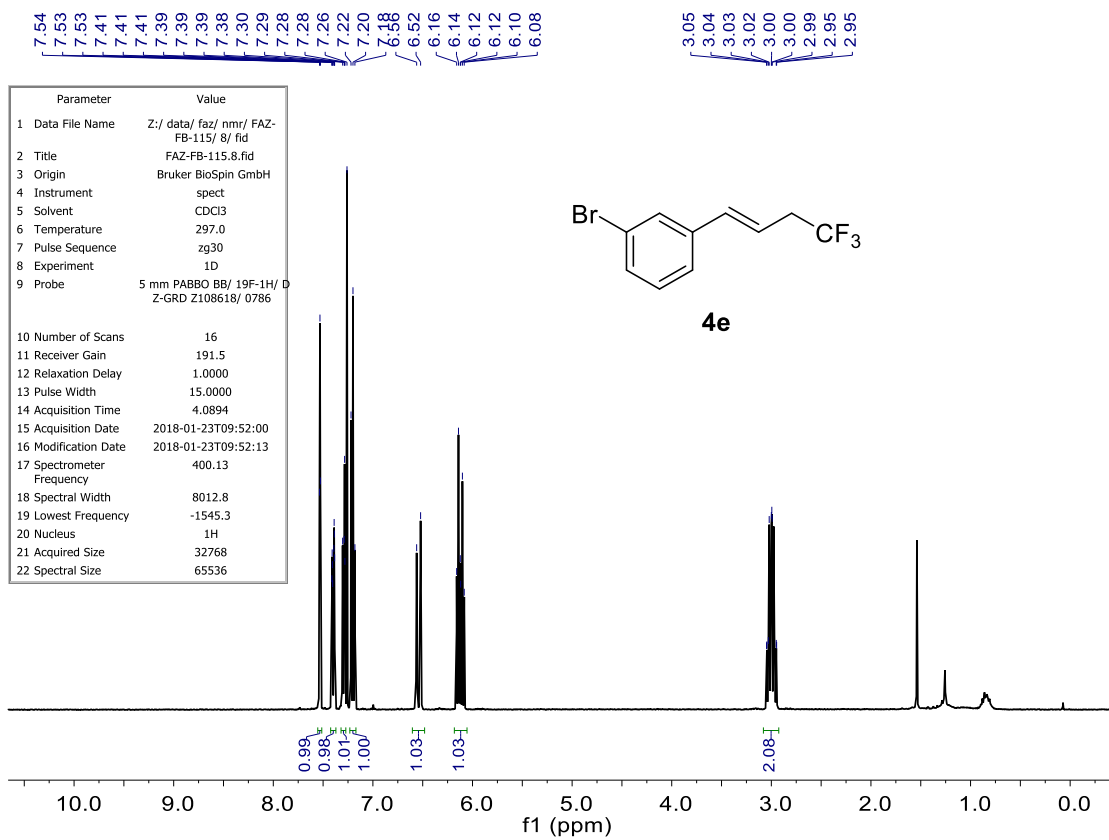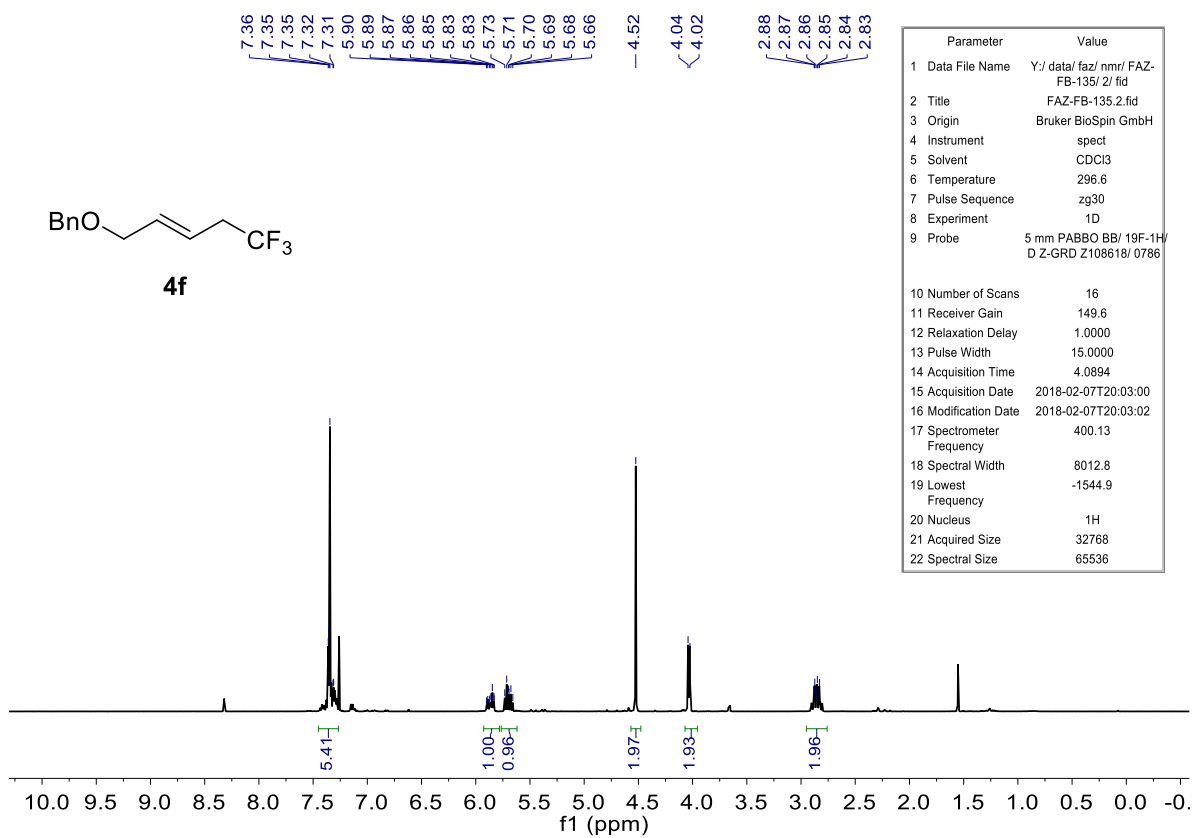

| Parameter                 | Value                                           |
|---------------------------|-------------------------------------------------|
| 1 Data File Name          | Y:\data\faz\nmr\FAZ-FB-137\9\fid                |
| 2 Title                   | FAZ-FB-137.9.fid                                |
| 3 Origin                  | Bruker BioSpin GmbH                             |
| 4 Instrument              | spect                                           |
| 5 Solvent                 | CDCl3                                           |
| 6 Temperature             | 296.5                                           |
| 7 Pulse Sequence          | zg30                                            |
| 8 Experiment              | 1D                                              |
| 9 Probe                   | 5 mm PABBO BB/ 19F-1H/<br>D Z-GRD Z108618/ 0786 |
| 10 Number of Scans        | 16                                              |
| 11 Receiver Gain          | 169.0                                           |
| 12 Relaxation Delay       | 1.0000                                          |
| 13 Pulse Width            | 15.0000                                         |
| 14 Acquisition Time       | 4.0894                                          |
| 15 Acquisition Date       | 2018-06-07T20:40:00                             |
| 16 Modification Date      | 2018-06-07T20:40:36                             |
| 17 Spectrometer Frequency | 400.13                                          |
| 18 Spectral Width         | 8012.8                                          |
| 19 Lowest Frequency       | -1545.2                                         |
| 20 Nucleus                | 1H                                              |
| 21 Acquired Size          | 32768                                           |
| 22 Spectral Size          | 65536                                           |

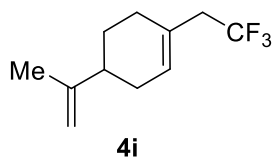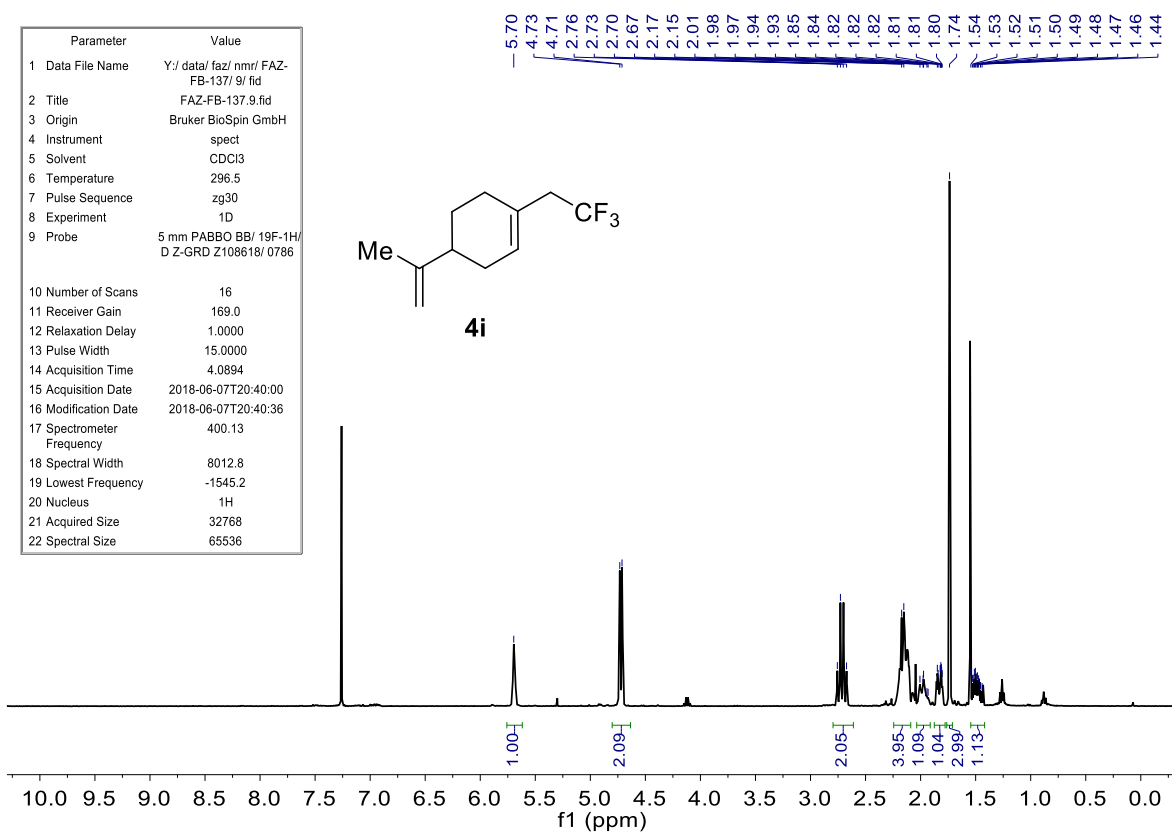

# Allenyl Trifluoromethanes (Table 3)

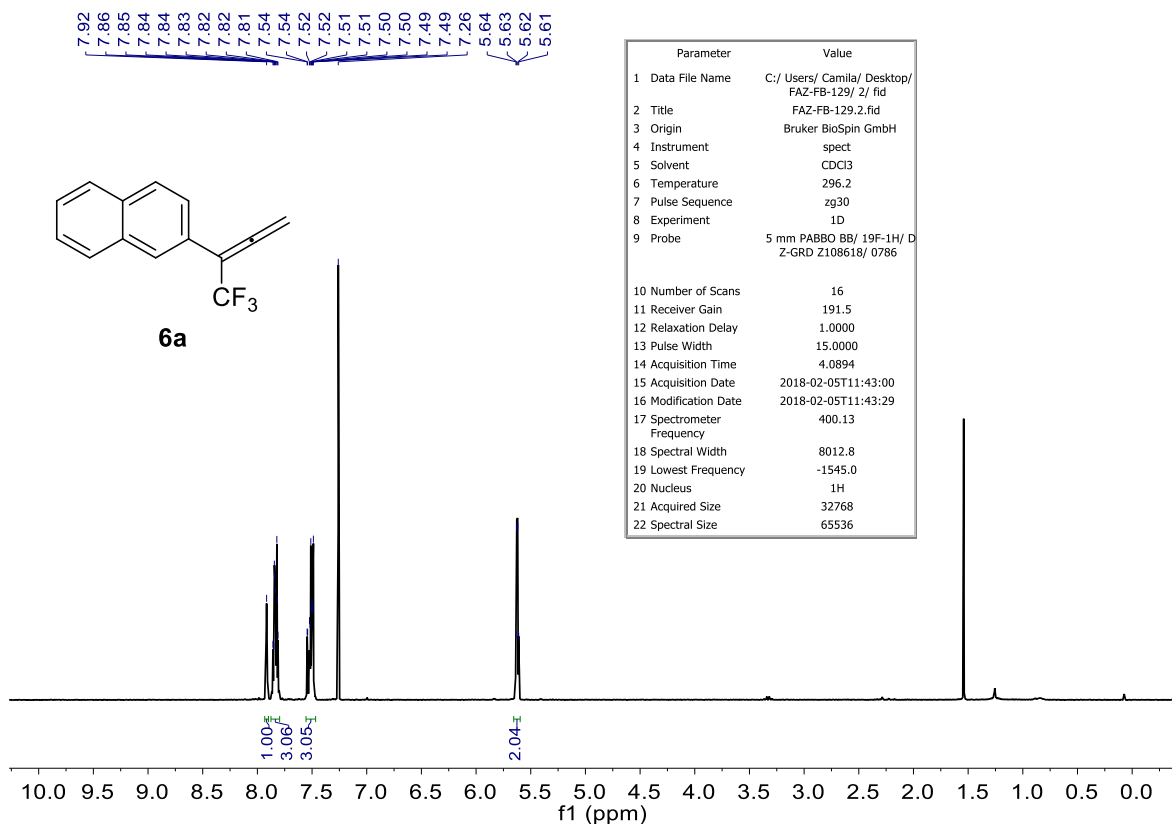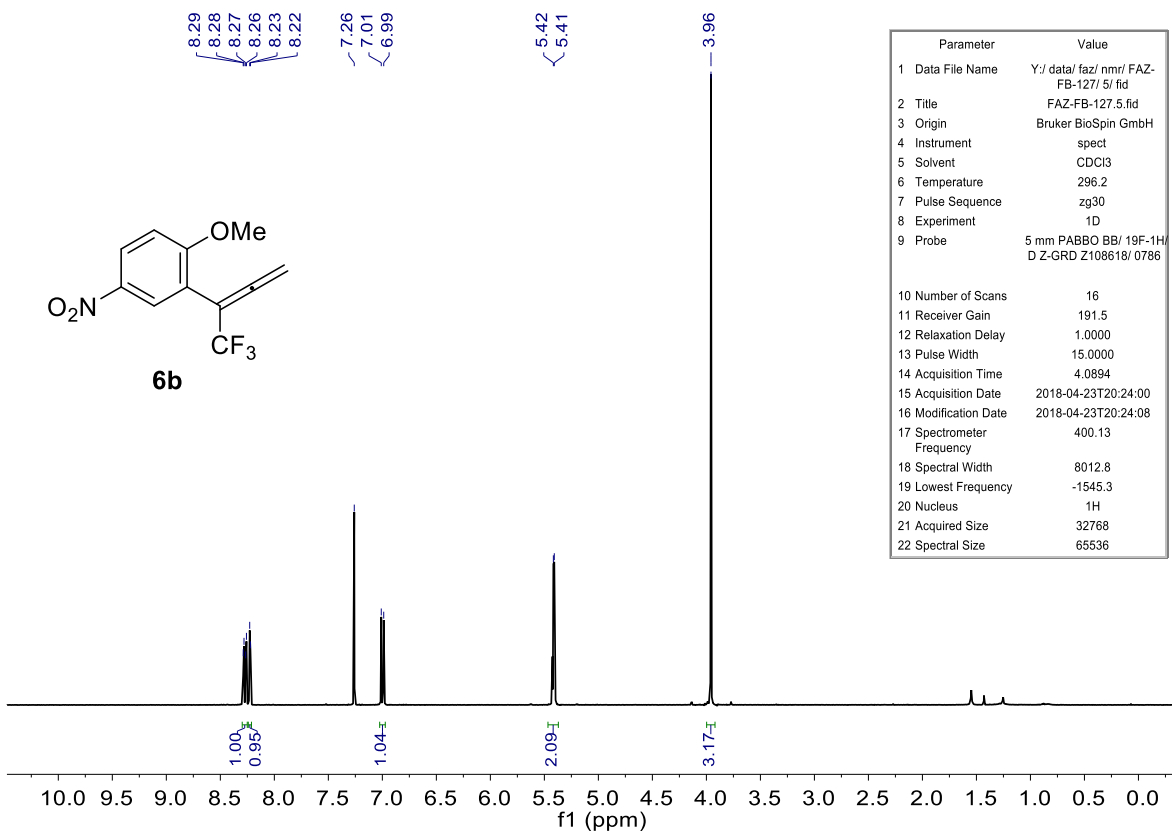

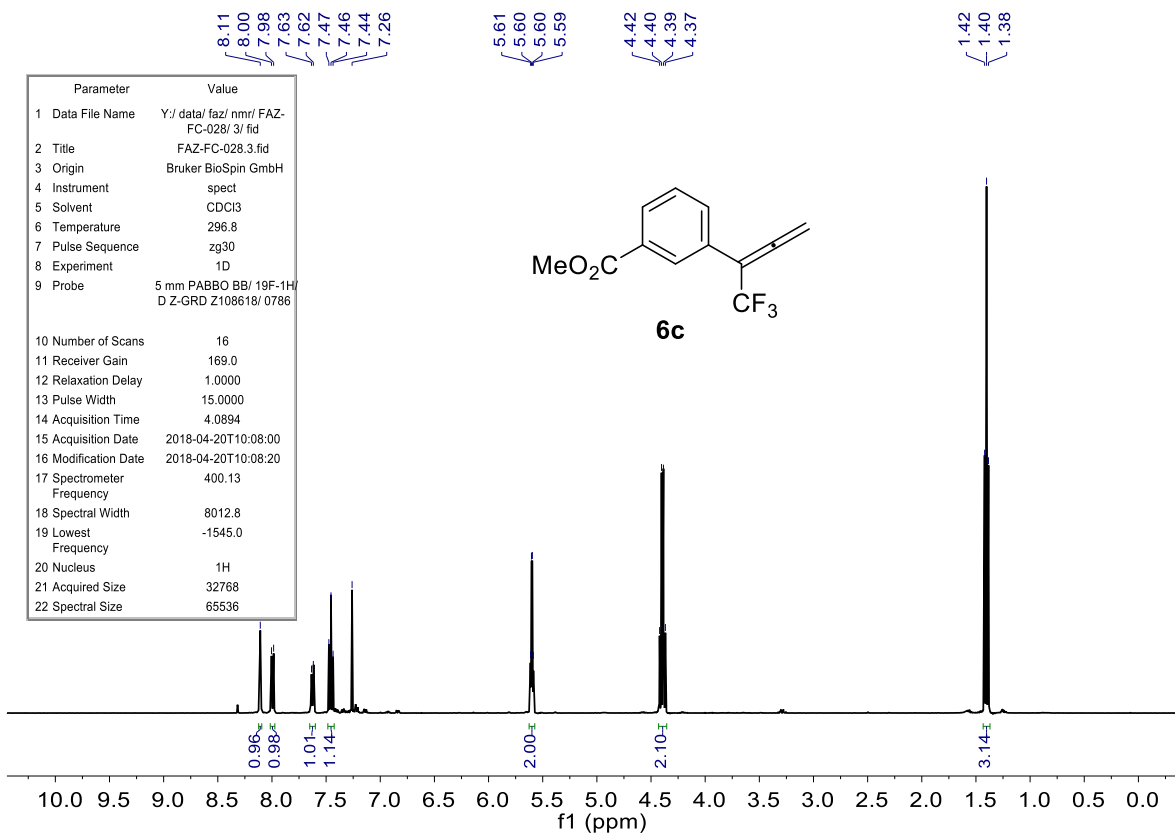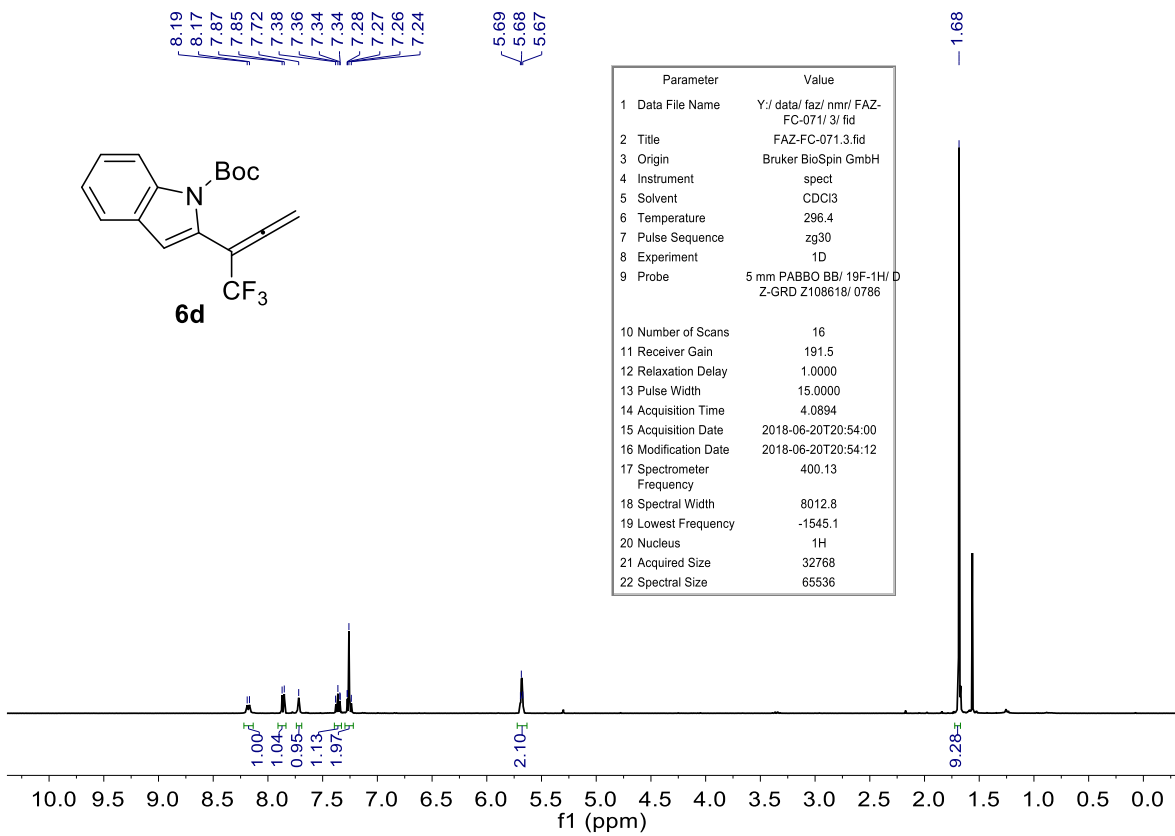



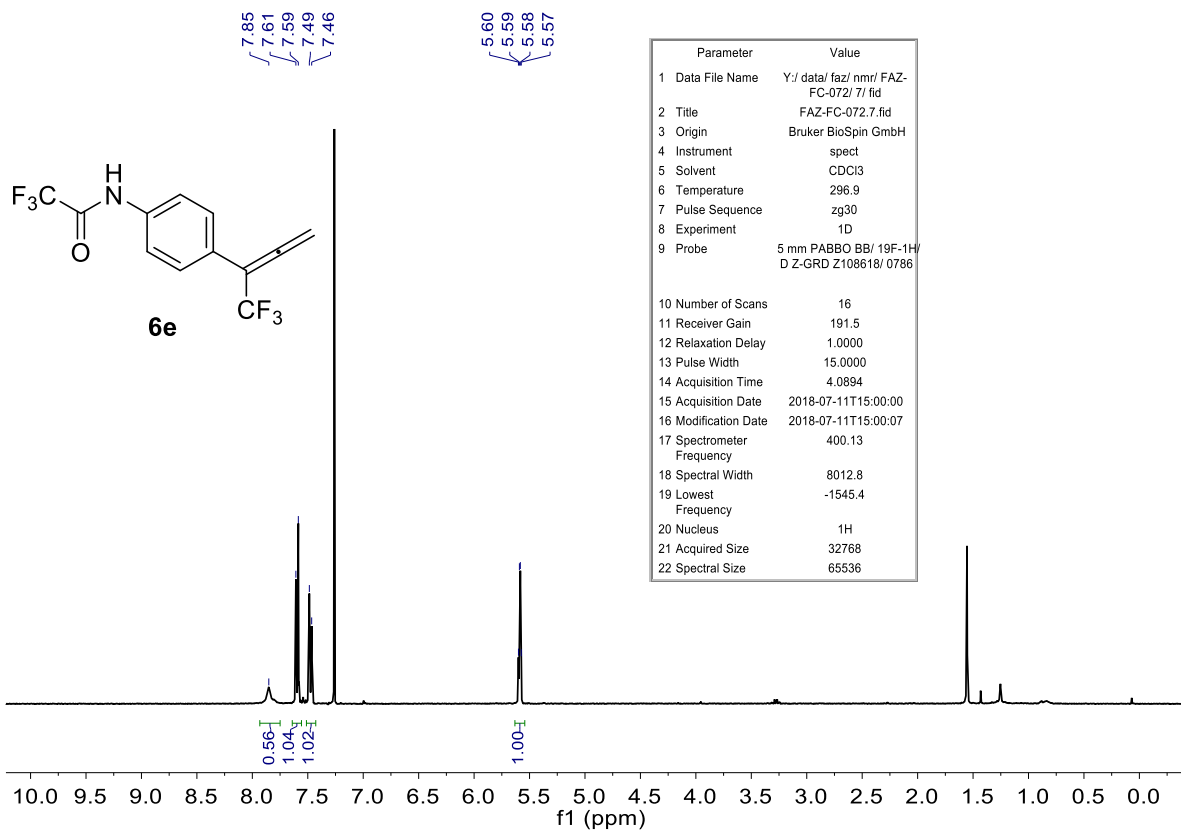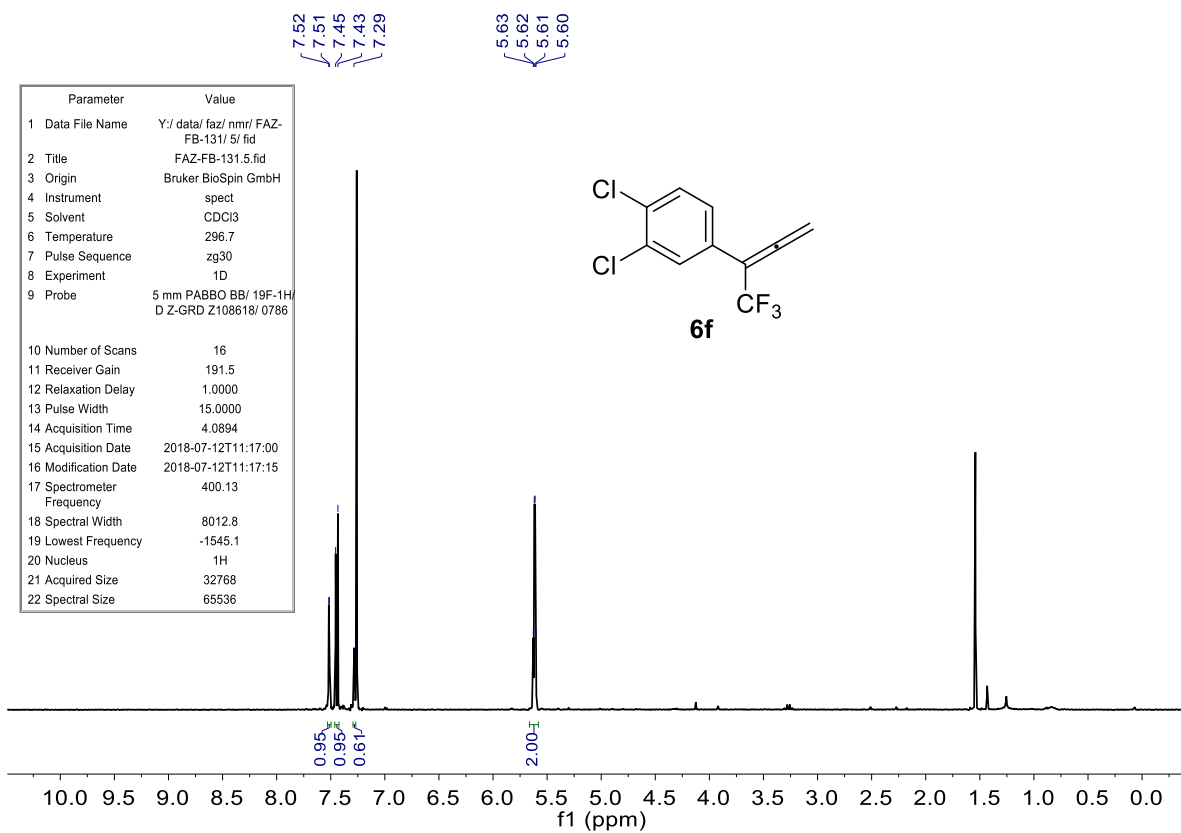

# Benzyl Trifluoromethanes (Table 4)

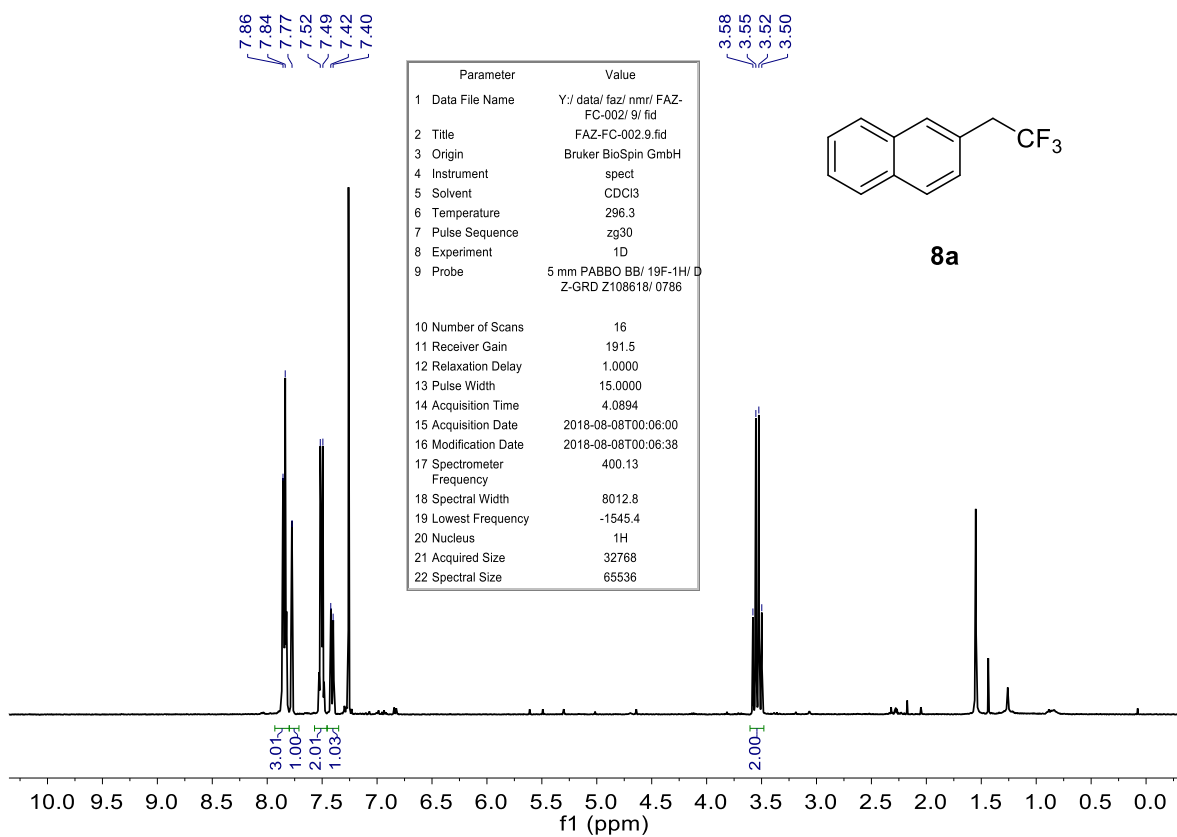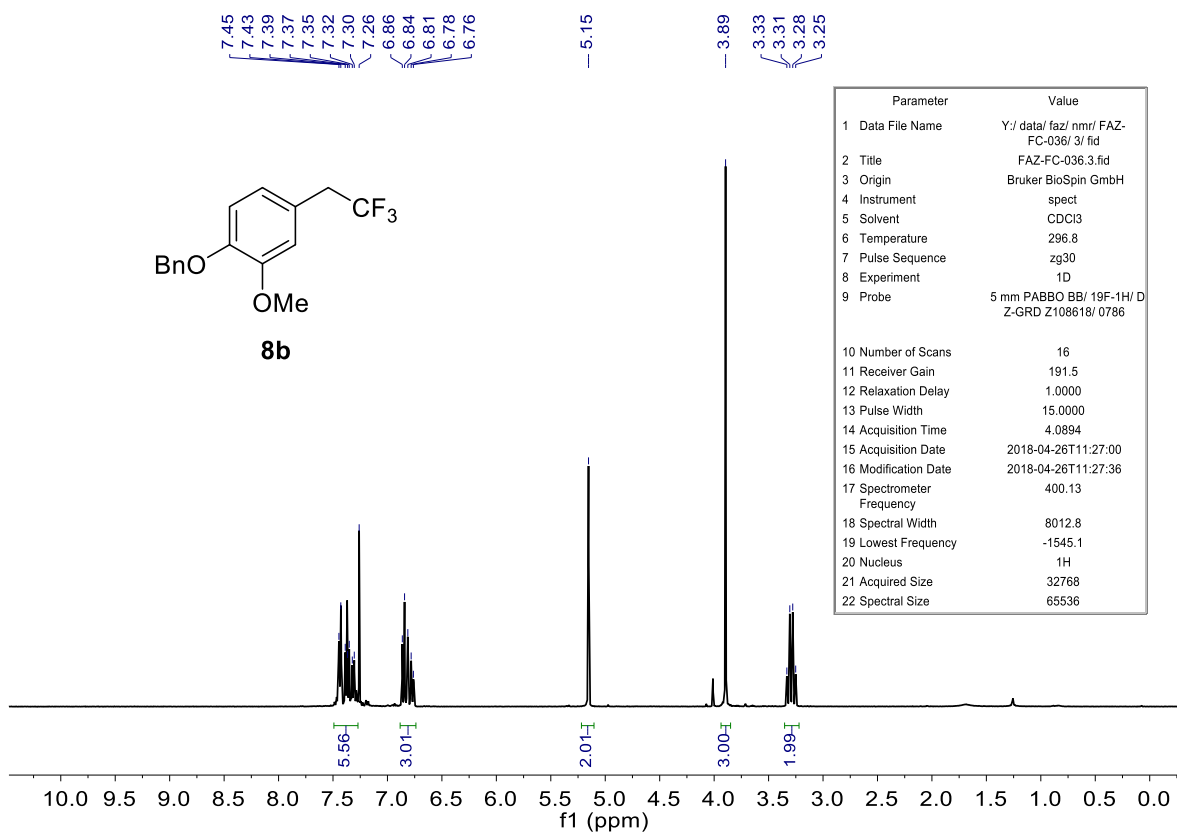

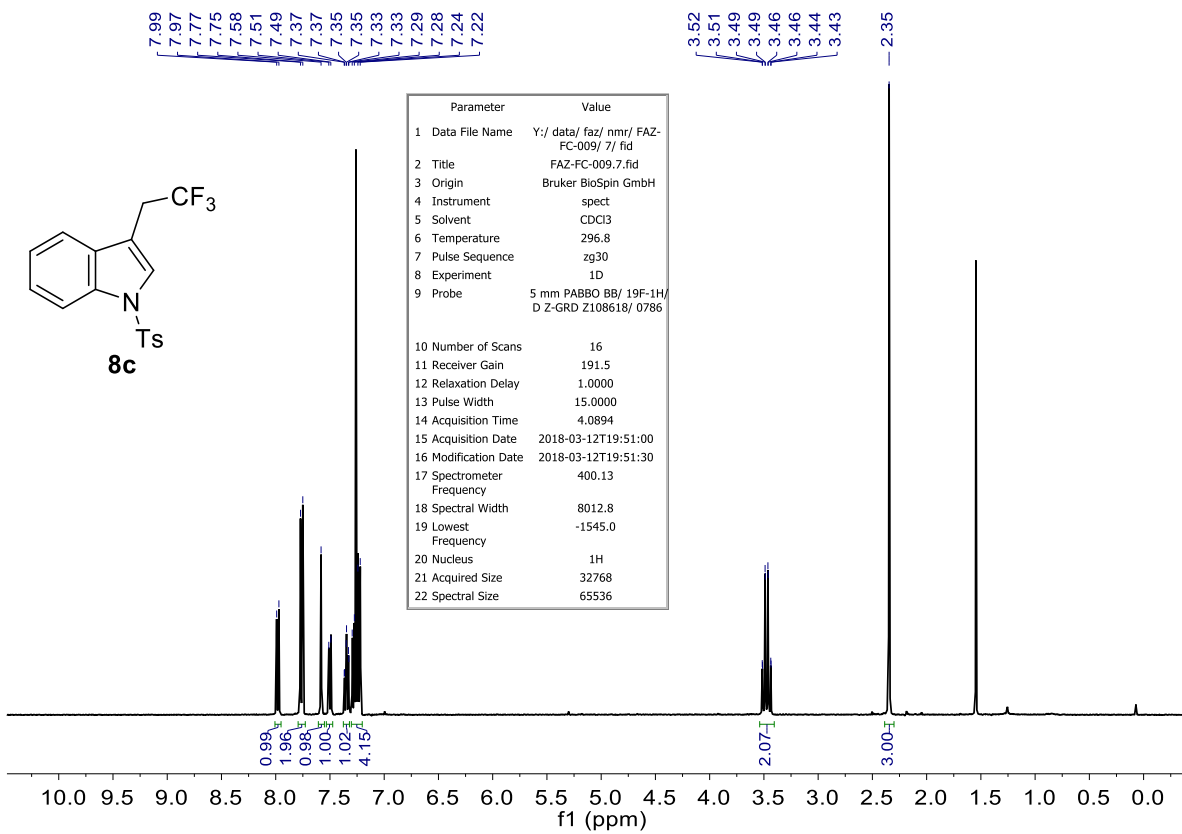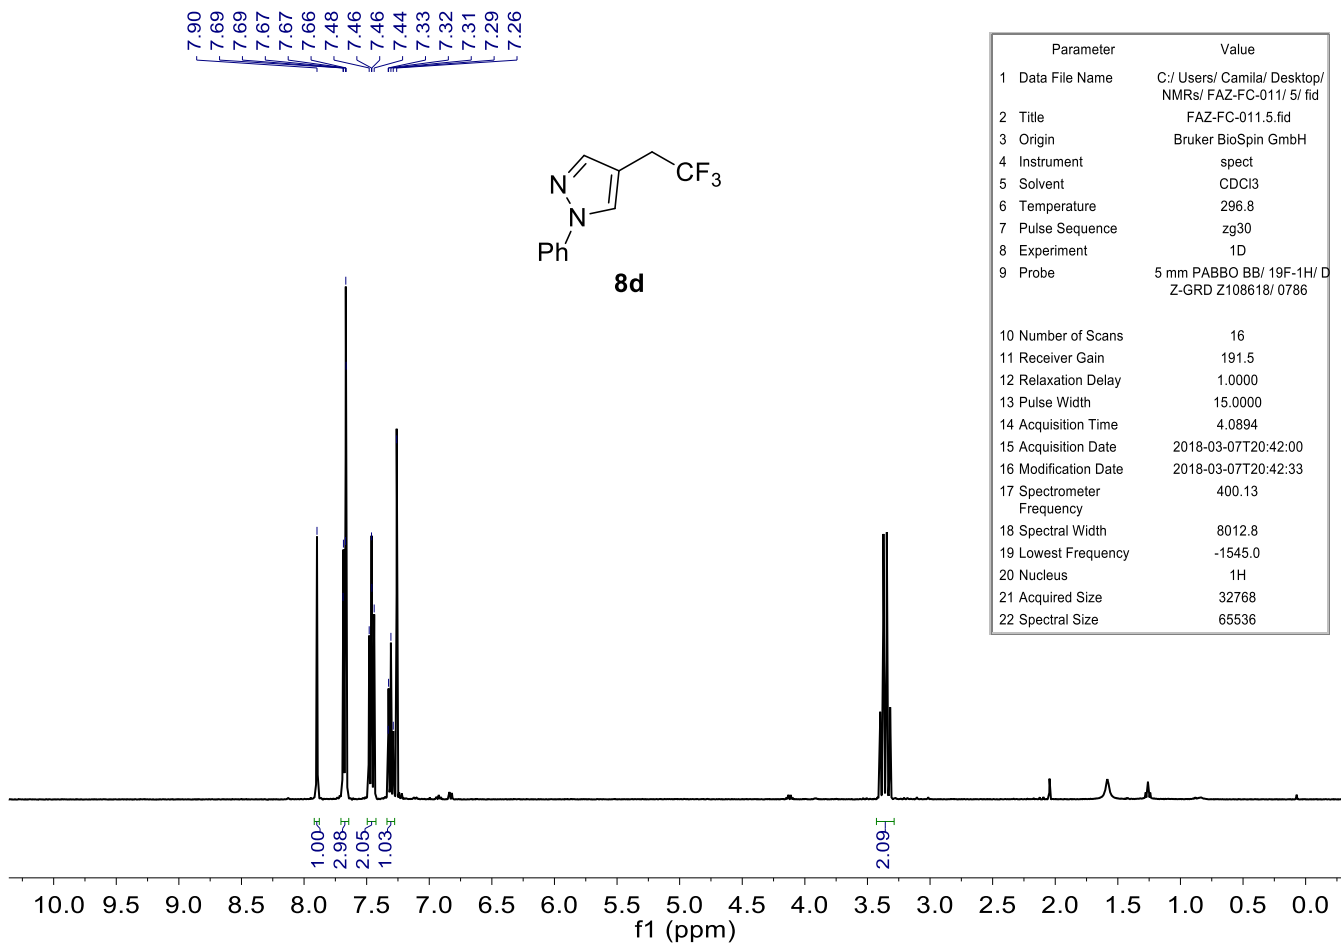

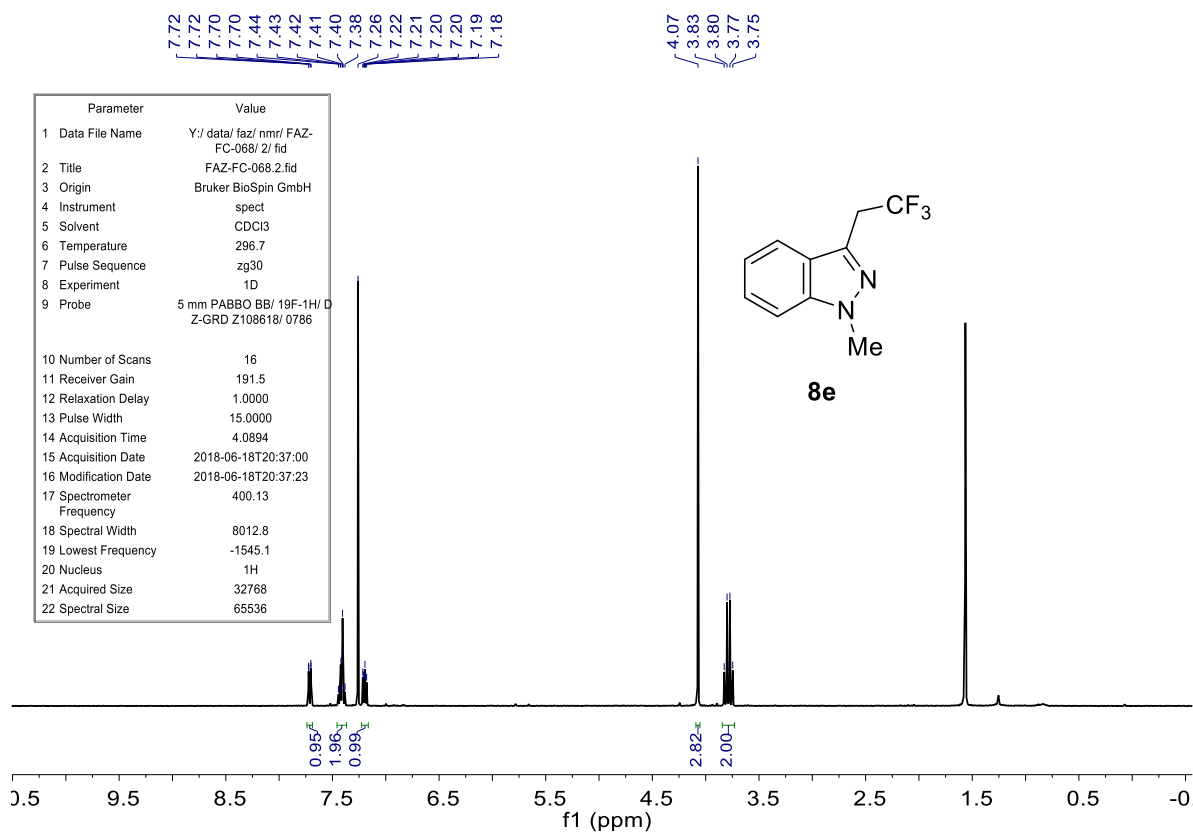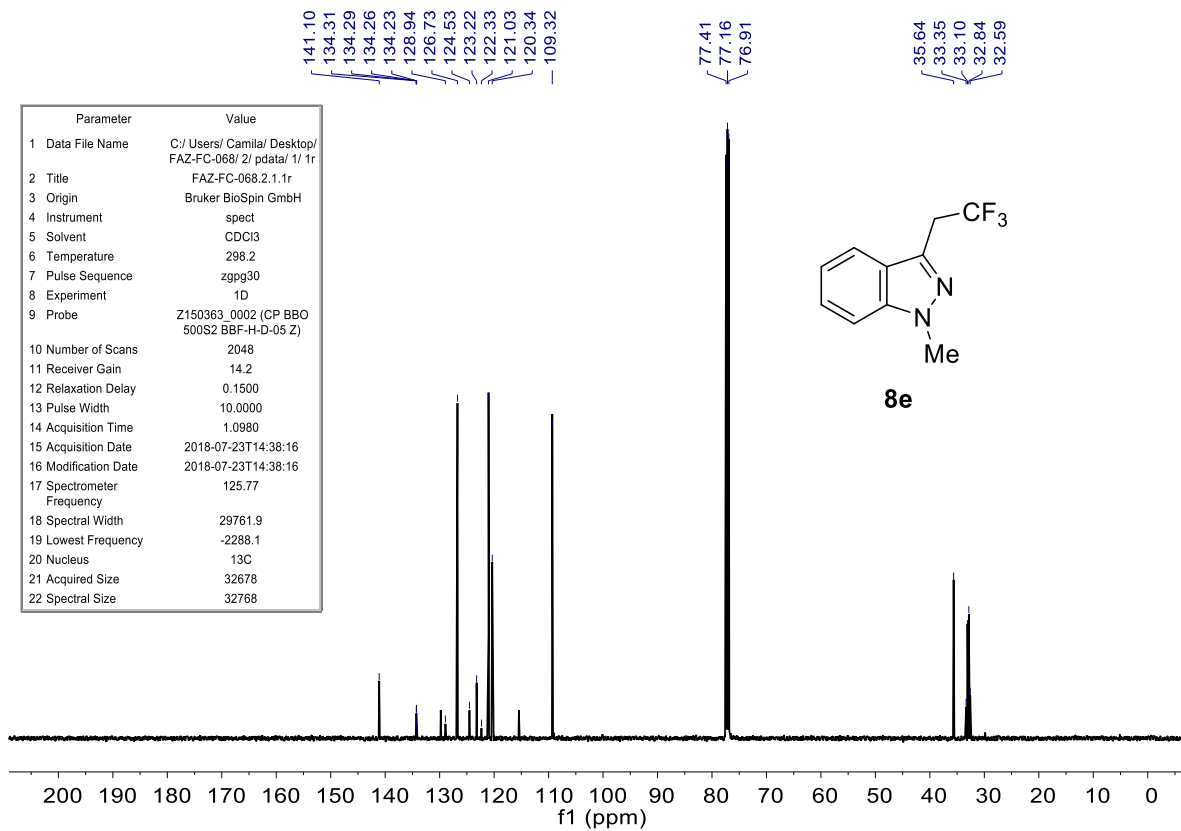

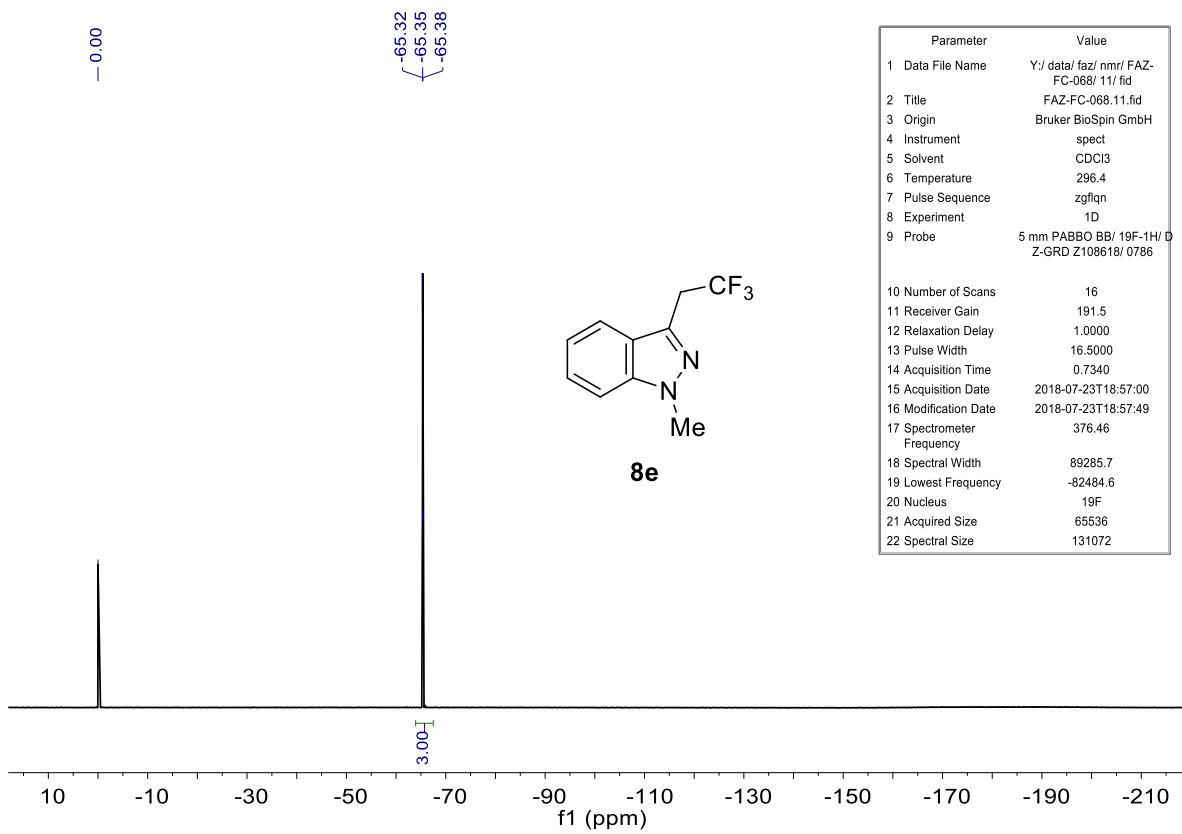

# Synthetic Applications (Scheme 1)

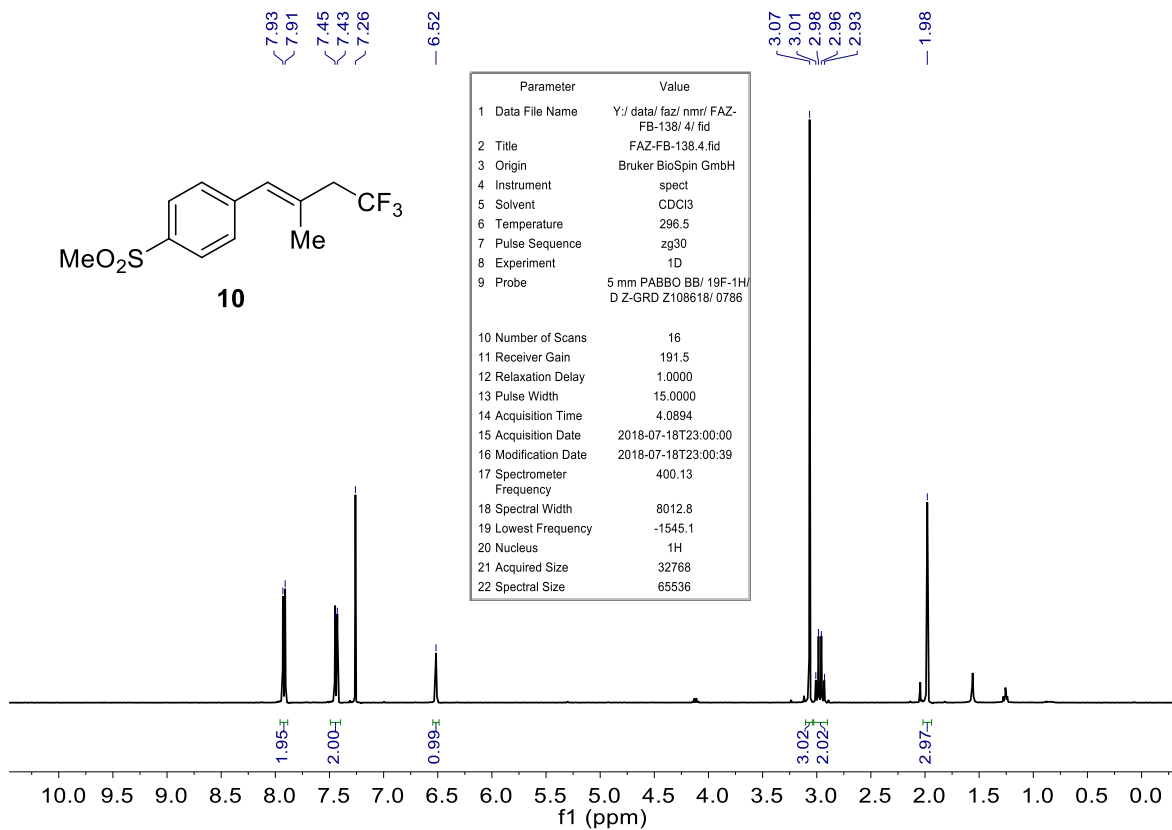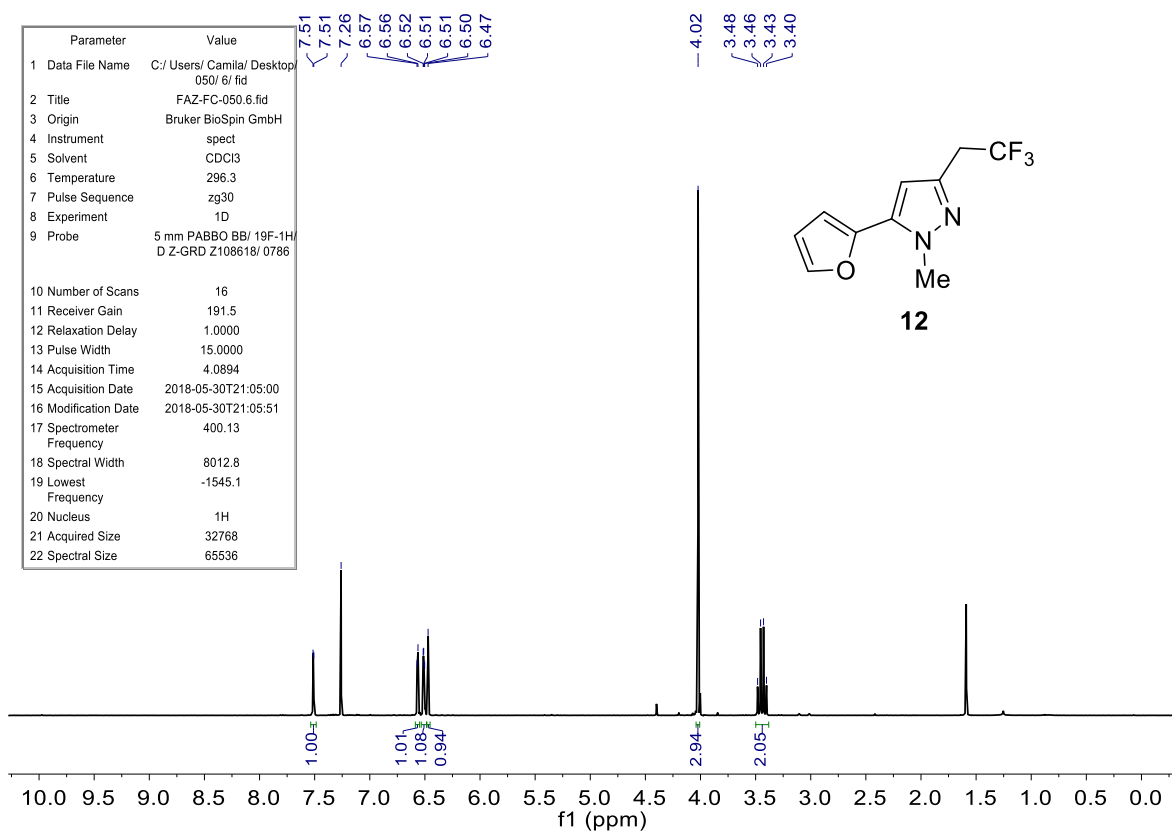

Supplement: NIHMS1012783-supplement-SI_File.pdf [file NIHMS1012783-supplement-SI_File.pdf]
